# Supplementary material for: Single cell cortical bone transcriptomics define novel osteolineage gene sets altered in chronic kidney disease
Source: PubMed Central journal article supplement (PMC9910177; doi:10.3389/fendo.2023.1063083), 2023-01-26
Supplement: DataSheet_1.pdf [file DataSheet_1.pdf]

| gene     | p_val    | avg_log2FC | pct.1 | pct.2 | p_val_adj | cluster       |
|----------|----------|------------|-------|-------|-----------|---------------|
| Serpine2 | 5.99E-64 | 3.43216923 | 0.96  | 0.305 | 3.32E-59  | Tnc_Mmp13_hiX |
| Tnc      | 1.09E-62 | 3.88254704 | 0.855 | 0.189 | 6.05E-58  | Tnc_Mmp13_hiX |
| Cdh11    | 6.52E-57 | 2.57482768 | 0.766 | 0.243 | 3.61E-52  | Tnc_Mmp13_hiX |
| Lifr     | 1.73E-47 | 2.84253636 | 0.798 | 0.421 | 9.60E-43  | Tnc_Mmp13_hiX |
| Pdgfrb   | 6.11E-47 | 2.53300266 | 0.589 | 0.054 | 3.39E-42  | Tnc_Mmp13_hiX |
| Olfml2b  | 4.93E-42 | 2.51145774 | 0.669 | 0.137 | 2.73E-37  | Tnc_Mmp13_hiX |
| Mmp13    | 3.19E-41 | 4.32070398 | 0.669 | 0.092 | 1.77E-36  | Tnc_Mmp13_hiX |
| Postn    | 1.53E-39 | 2.70088708 | 0.637 | 0.109 | 8.47E-35  | Tnc_Mmp13_hiX |
| Cfh      | 6.34E-39 | 2.28695593 | 0.895 | 0.364 | 3.51E-34  | Tnc_Mmp13_hiX |
| Islr     | 1.26E-38 | 2.32787752 | 0.565 | 0.106 | 6.98E-34  | Tnc_Mmp13_hiX |
| Cp       | 4.73E-38 | 2.17747829 | 0.661 | 0.132 | 2.62E-33  | Tnc_Mmp13_hiX |
| Loxl1    | 7.14E-37 | 2.2017403  | 0.5   | 0.043 | 3.96E-32  | Tnc_Mmp13_hiX |
| Gdpd2    | 6.16E-36 | 2.57165711 | 0.435 | 0.009 | 3.41E-31  | Tnc_Mmp13_hiX |
| Adamts2  | 1.40E-35 | 1.82414547 | 0.734 | 0.3   | 7.77E-31  | Tnc_Mmp13_hiX |
| Rn18s    | 5.09E-35 | 2.18166234 | 1     | 0.998 | 2.82E-30  | Tnc_Mmp13_hiX |
| Zfhx4    | 1.75E-34 | 1.83057533 | 0.589 | 0.121 | 9.72E-30  | Tnc_Mmp13_hiX |
| Col12a1  | 4.49E-34 | 2.36832337 | 0.637 | 0.118 | 2.49E-29  | Tnc_Mmp13_hiX |
| Dpysl3   | 6.49E-34 | 1.78302644 | 0.645 | 0.248 | 3.59E-29  | Tnc_Mmp13_hiX |
| Spp1     | 9.88E-34 | 3.10306069 | 0.79  | 0.364 | 5.47E-29  | Tnc_Mmp13_hiX |
| Olfml3   | 1.17E-33 | 2.0129727  | 0.758 | 0.27  | 6.51E-29  | Tnc_Mmp13_hiX |
| Tpm1     | 1.38E-33 | 1.9867228  | 0.871 | 0.489 | 7.66E-29  | Tnc_Mmp13_hiX |
| Fgfr2    | 5.58E-33 | 1.69599742 | 0.589 | 0.113 | 3.09E-28  | Tnc_Mmp13_hiX |
| Colec12  | 1.13E-32 | 1.83612001 | 0.645 | 0.199 | 6.25E-28  | Tnc_Mmp13_hiX |
| Col6a1   | 1.36E-32 | 2.40576984 | 0.677 | 0.156 | 7.52E-28  | Tnc_Mmp13_hiX |
| Serping1 | 8.04E-32 | 2.97943161 | 0.548 | 0.102 | 4.46E-27  | Tnc_Mmp13_hiX |
| Sdc2     | 1.51E-31 | 1.94533061 | 0.637 | 0.206 | 8.39E-27  | Tnc_Mmp13_hiX |
| Fap      | 1.57E-31 | 2.04026232 | 0.782 | 0.296 | 8.71E-27  | Tnc_Mmp13_hiX |
| Antxr1   | 3.03E-31 | 1.79791964 | 0.565 | 0.123 | 1.68E-26  | Tnc_Mmp13_hiX |
| Ogn      | 3.88E-31 | 1.98890645 | 0.379 | 0.012 | 2.15E-26  | Tnc_Mmp13_hiX |
| Vdr      | 1.99E-30 | 1.95113576 | 0.532 | 0.18  | 1.10E-25  | Tnc_Mmp13_hiX |
| Slit2    | 2.95E-30 | 1.86325948 | 0.548 | 0.154 | 1.64E-25  | Tnc_Mmp13_hiX |
| Cst3     | 1.11E-29 | 1.90663998 | 0.96  | 0.851 | 6.17E-25  | Tnc_Mmp13_hiX |
| Igfbp5   | 1.96E-29 | 3.59310498 | 0.589 | 0.109 | 1.09E-24  | Tnc_Mmp13_hiX |
| Neo1     | 7.65E-29 | 1.58396507 | 0.556 | 0.177 | 4.24E-24  | Tnc_Mmp13_hiX |
| Foxc1    | 1.04E-28 | 1.82996573 | 0.589 | 0.163 | 5.78E-24  | Tnc_Mmp13_hiX |
| Col6a2   | 2.25E-28 | 2.23821761 | 0.629 | 0.139 | 1.25E-23  | Tnc_Mmp13_hiX |
| Lrp1     | 3.33E-28 | 1.58237208 | 0.726 | 0.324 | 1.84E-23  | Tnc_Mmp13_hiX |
| Ptprd    | 1.12E-27 | 1.78626076 | 0.702 | 0.255 | 6.18E-23  | Tnc_Mmp13_hiX |
| Ccdc80   | 1.23E-27 | 1.84444414 | 0.742 | 0.305 | 6.79E-23  | Tnc_Mmp13_hiX |
| Fbn1     | 1.85E-27 | 1.95251404 | 0.435 | 0.047 | 1.03E-22  | Tnc_Mmp13_hiX |
| Bicc1    | 1.39E-26 | 1.68472349 | 0.589 | 0.206 | 7.69E-22  | Tnc_Mmp13_hiX |
| Cpxm1    | 3.05E-26 | 1.72407846 | 0.419 | 0.052 | 1.69E-21  | Tnc_Mmp13_hiX |
| Mxra8    | 3.26E-26 | 1.58028432 | 0.726 | 0.359 | 1.81E-21  | Tnc_Mmp13_hiX |
| Fstl1    | 3.79E-26 | 2.08026293 | 0.597 | 0.243 | 2.10E-21  | Tnc_Mmp13_hiX |
| S1pr3    | 4.61E-26 | 1.69822353 | 0.484 | 0.156 | 2.56E-21  | Tnc_Mmp13_hiX |

|          |          |            |       |       |          |               |
|----------|----------|------------|-------|-------|----------|---------------|
| Lrp4     | 6.03E-26 | 1.77357143 | 0.621 | 0.31  | 3.34E-21 | Tnc_Mmp13_hiX |
| Gas1     | 1.48E-25 | 1.6477645  | 0.476 | 0.087 | 8.18E-21 | Tnc_Mmp13_hiX |
| Prrx1    | 3.11E-25 | 1.50455068 | 0.54  | 0.137 | 1.72E-20 | Tnc_Mmp13_hiX |
| Lum      | 3.92E-25 | 2.35749417 | 0.71  | 0.293 | 2.17E-20 | Tnc_Mmp13_hiX |
| Col8a1   | 9.44E-25 | 2.2992036  | 0.387 | 0.033 | 5.23E-20 | Tnc_Mmp13_hiX |
| Tbx2     | 4.06E-24 | 1.64756858 | 0.532 | 0.173 | 2.25E-19 | Tnc_Mmp13_hiX |
| Cxcl14   | 4.42E-24 | 2.16667734 | 0.323 | 0.009 | 2.45E-19 | Tnc_Mmp13_hiX |
| Ebf1     | 6.74E-24 | 1.69165496 | 0.742 | 0.317 | 3.74E-19 | Tnc_Mmp13_hiX |
| Limch1   | 7.79E-24 | 2.18513184 | 0.468 | 0.116 | 4.32E-19 | Tnc_Mmp13_hiX |
| Gas6     | 1.15E-23 | 2.52005244 | 0.556 | 0.177 | 6.36E-19 | Tnc_Mmp13_hiX |
| Srpx2    | 1.38E-23 | 1.65980475 | 0.548 | 0.168 | 7.67E-19 | Tnc_Mmp13_hiX |
| Shox2    | 1.55E-23 | 1.59020656 | 0.597 | 0.215 | 8.56E-19 | Tnc_Mmp13_hiX |
| Tmem176b | 1.83E-23 | 1.52291577 | 0.815 | 0.577 | 1.01E-18 | Tnc_Mmp13_hiX |
| Sema7a   | 2.14E-23 | 1.65312195 | 0.556 | 0.215 | 1.18E-18 | Tnc_Mmp13_hiX |
| Palld    | 1.32E-22 | 1.52267849 | 0.476 | 0.17  | 7.34E-18 | Tnc_Mmp13_hiX |
| Angpt4   | 1.63E-22 | 1.77297754 | 0.363 | 0.028 | 9.06E-18 | Tnc_Mmp13_hiX |
| Col5a3   | 2.84E-22 | 1.75091617 | 0.331 | 0.021 | 1.57E-17 | Tnc_Mmp13_hiX |
| Itgb5    | 7.79E-22 | 1.56041923 | 0.427 | 0.092 | 4.32E-17 | Tnc_Mmp13_hiX |
| Gsn      | 8.74E-22 | 1.75366527 | 0.831 | 0.508 | 4.84E-17 | Tnc_Mmp13_hiX |
| Alpl     | 1.64E-20 | 2.12745849 | 0.677 | 0.317 | 9.07E-16 | Tnc_Mmp13_hiX |
| Vldlr    | 4.44E-20 | 1.9746534  | 0.435 | 0.175 | 2.46E-15 | Tnc_Mmp13_hiX |
| Gpx3     | 4.55E-20 | 1.53574884 | 0.831 | 0.374 | 2.52E-15 | Tnc_Mmp13_hiX |
| Ncam1    | 6.61E-20 | 1.66079517 | 0.565 | 0.284 | 3.66E-15 | Tnc_Mmp13_hiX |
| Tnfrsf19 | 9.75E-20 | 1.55787396 | 0.387 | 0.109 | 5.40E-15 | Tnc_Mmp13_hiX |
| Ccn5     | 1.64E-19 | 1.68055835 | 0.258 | 0.009 | 9.10E-15 | Tnc_Mmp13_hiX |
| Pth1r    | 3.41E-18 | 1.53110125 | 0.774 | 0.35  | 1.89E-13 | Tnc_Mmp13_hiX |
| Mir6236  | 7.45E-18 | 1.71157216 | 0.935 | 0.844 | 4.13E-13 | Tnc_Mmp13_hiX |
| Wif1     | 2.52E-17 | 2.19119816 | 0.532 | 0.227 | 1.40E-12 | Tnc_Mmp13_hiX |
| Cd109    | 1.01E-40 | 3.01657318 | 0.962 | 0.144 | 5.61E-36 | Osteocytes    |
| Phex     | 5.17E-39 | 3.90711405 | 1     | 0.19  | 2.87E-34 | Osteocytes    |
| Ackr3    | 1.17E-30 | 2.85849168 | 0.923 | 0.069 | 6.51E-26 | Osteocytes    |
| Pdgfa    | 1.07E-26 | 2.50221757 | 1     | 0.276 | 5.96E-22 | Osteocytes    |
| Irx5     | 2.20E-26 | 1.78314995 | 0.962 | 0.069 | 1.22E-21 | Osteocytes    |
| Pdpn     | 1.31E-24 | 2.28938698 | 0.885 | 0.067 | 7.27E-20 | Osteocytes    |
| Adamts14 | 1.38E-24 | 1.70433576 | 0.846 | 0.058 | 7.65E-20 | Osteocytes    |
| Dkk1     | 2.11E-24 | 2.54009464 | 0.923 | 0.067 | 1.17E-19 | Osteocytes    |
| Ramp1    | 3.70E-24 | 2.59364263 | 0.962 | 0.305 | 2.05E-19 | Osteocytes    |
| Ptprz1   | 6.19E-24 | 2.72814517 | 1     | 0.194 | 3.43E-19 | Osteocytes    |
| Car12    | 7.64E-23 | 2.61587306 | 0.731 | 0.035 | 4.23E-18 | Osteocytes    |
| Col24a1  | 2.73E-22 | 2.08837185 | 0.923 | 0.125 | 1.51E-17 | Osteocytes    |
| Bmp4     | 2.17E-21 | 1.80866938 | 0.885 | 0.077 | 1.20E-16 | Osteocytes    |
| Gm41724  | 9.69E-20 | 1.94281138 | 0.692 | 0.052 | 5.37E-15 | Osteocytes    |
| Wasl     | 1.01E-19 | 2.17987121 | 0.962 | 0.273 | 5.59E-15 | Osteocytes    |
| Ccdc194  | 1.45E-19 | 1.5658339  | 0.885 | 0.104 | 8.03E-15 | Osteocytes    |
| Bmp2     | 1.51E-19 | 2.05433911 | 0.846 | 0.113 | 8.36E-15 | Osteocytes    |
| Bambi    | 2.68E-19 | 2.55474561 | 0.923 | 0.386 | 1.48E-14 | Osteocytes    |

|          |           |            |       |       |          |                     |
|----------|-----------|------------|-------|-------|----------|---------------------|
| Dmp1     | 4.84E-19  | 3.65905173 | 0.923 | 0.211 | 2.68E-14 | Osteocytes          |
| Spns2    | 1.41E-18  | 1.83744552 | 0.923 | 0.273 | 7.79E-14 | Osteocytes          |
| Ptgis    | 1.02E-17  | 2.05615892 | 1     | 0.307 | 5.67E-13 | Osteocytes          |
| Ccn4     | 1.11E-17  | 2.03981406 | 1     | 0.307 | 6.14E-13 | Osteocytes          |
| Myo1b    | 1.32E-17  | 1.71154411 | 0.962 | 0.338 | 7.29E-13 | Osteocytes          |
| Plpp1    | 1.94E-16  | 1.80693966 | 1     | 0.246 | 1.07E-11 | Osteocytes          |
| Cspg4    | 4.65E-16  | 1.5793323  | 0.923 | 0.171 | 2.58E-11 | Osteocytes          |
| Smpd3    | 2.49E-80  | 3.45806743 | 0.973 | 0.108 | 1.38E-75 | Osteoblasts         |
| Col11a2  | 2.12E-74  | 3.26461867 | 1     | 0.165 | 1.17E-69 | Osteoblasts         |
| Col1a1   | 5.04E-68  | 3.15036672 | 1     | 0.547 | 2.79E-63 | Osteoblasts         |
| Col11a1  | 2.06E-61  | 2.76005677 | 0.991 | 0.243 | 1.14E-56 | Osteoblasts         |
| Col5a2   | 2.23E-60  | 2.38841722 | 1     | 0.378 | 1.24E-55 | Osteoblasts         |
| Col1a2   | 6.04E-60  | 2.81528597 | 1     | 0.499 | 3.35E-55 | Osteoblasts         |
| Cpz      | 7.01E-59  | 2.09200578 | 0.855 | 0.078 | 3.88E-54 | Osteoblasts         |
| Col22a1  | 4.13E-58  | 1.83655941 | 0.973 | 0.176 | 2.29E-53 | Osteoblasts         |
| Col5a1   | 4.15E-58  | 2.13047401 | 0.991 | 0.281 | 2.30E-53 | Osteoblasts         |
| Cthrc1   | 1.40E-57  | 2.41654235 | 0.855 | 0.11  | 7.77E-53 | Osteoblasts         |
| Rrbp1    | 1.82E-57  | 1.92418914 | 0.991 | 0.627 | 1.01E-52 | Osteoblasts         |
| Serpinf1 | 1.23E-56  | 2.67505724 | 0.973 | 0.307 | 6.81E-52 | Osteoblasts         |
| Sparc    | 1.89E-56  | 2.35162287 | 1     | 0.65  | 1.05E-51 | Osteoblasts         |
| Fkbp11   | 4.01E-55  | 1.92949118 | 0.873 | 0.128 | 2.22E-50 | Osteoblasts         |
| Cgref1   | 3.49E-54  | 1.96338088 | 0.827 | 0.101 | 1.93E-49 | Osteoblasts         |
| Ifitm5   | 1.04E-52  | 2.2852029  | 0.873 | 0.126 | 5.79E-48 | Osteoblasts         |
| Bglap2   | 4.46E-50  | 3.33120685 | 0.955 | 0.286 | 2.47E-45 | Osteoblasts         |
| Bglap    | 7.46E-50  | 3.36374944 | 0.973 | 0.384 | 4.14E-45 | Osteoblasts         |
| Dcn      | 1.15E-49  | 1.57418471 | 0.991 | 0.277 | 6.37E-45 | Osteoblasts         |
| Creb3l1  | 2.24E-49  | 1.84217049 | 0.891 | 0.185 | 1.24E-44 | Osteoblasts         |
| Snhg18   | 6.37E-49  | 1.69881471 | 0.945 | 0.211 | 3.53E-44 | Osteoblasts         |
| Tmem119  | 2.71E-48  | 1.70493619 | 0.836 | 0.119 | 1.50E-43 | Osteoblasts         |
| Serpinh1 | 9.59E-48  | 1.85471201 | 1     | 0.558 | 5.32E-43 | Osteoblasts         |
| Lox      | 4.60E-47  | 1.65132074 | 0.927 | 0.208 | 2.55E-42 | Osteoblasts         |
| Car3     | 2.31E-45  | 1.80333235 | 0.909 | 0.19  | 1.28E-40 | Osteoblasts         |
| Rcn3     | 2.16E-43  | 1.64525629 | 0.982 | 0.437 | 1.19E-38 | Osteoblasts         |
| Gpx3     | 3.97E-43  | 1.56689112 | 1     | 0.346 | 2.20E-38 | Osteoblasts         |
| Tent5a   | 1.21E-42  | 1.73445597 | 0.936 | 0.323 | 6.70E-38 | Osteoblasts         |
| Kdelr2   | 1.71E-42  | 1.67049892 | 0.927 | 0.476 | 9.47E-38 | Osteoblasts         |
| Cdo1     | 5.64E-42  | 1.6974857  | 0.755 | 0.098 | 3.12E-37 | Osteoblasts         |
| Ibsp     | 5.82E-42  | 2.3490186  | 0.982 | 0.316 | 3.22E-37 | Osteoblasts         |
| Nupr1    | 2.56E-38  | 1.93815086 | 0.945 | 0.334 | 1.42E-33 | Osteoblasts         |
| Pcolce   | 3.90E-38  | 1.67779027 | 0.936 | 0.297 | 2.16E-33 | Osteoblasts         |
| Timp1    | 1.94E-27  | 1.85464172 | 0.791 | 0.238 | 1.07E-22 | Osteoblasts         |
| Ccn1     | 1.26E-20  | 2.08071419 | 0.718 | 0.256 | 6.98E-16 | Osteoblasts         |
| Cebpb    | 4.38E-103 | 4.25581685 | 1     | 0.534 | 2.43E-98 | Hemopoetic_cells_II |
| Fth1     | 1.03E-100 | 4.0957679  | 1     | 0.908 | 5.73E-96 | Hemopoetic_cells_II |
| Srgn     | 1.65E-91  | 4.51508538 | 0.987 | 0.41  | 9.13E-87 | Hemopoetic_cells_II |
| Clec4d   | 6.15E-87  | 4.68182441 | 0.975 | 0.024 | 3.41E-82 | Hemopoetic_cells_II |

|         |          |            |       |       |          |                     |
|---------|----------|------------|-------|-------|----------|---------------------|
| S100a11 | 1.32E-86 | 3.21154805 | 0.987 | 0.69  | 7.29E-82 | Hemopoetic_cells_II |
| Il1r2   | 7.37E-85 | 5.00927235 | 0.975 | 0.043 | 4.09E-80 | Hemopoetic_cells_II |
| Cxcl2   | 1.41E-83 | 6.57677754 | 0.987 | 0.077 | 7.81E-79 | Hemopoetic_cells_II |
| Litaf   | 1.74E-79 | 3.06617092 | 0.924 | 0.498 | 9.65E-75 | Hemopoetic_cells_II |
| Acod1   | 2.77E-79 | 5.43891476 | 0.924 | 0.019 | 1.54E-74 | Hemopoetic_cells_II |
| Msrb1   | 4.18E-77 | 3.72521975 | 0.962 | 0.301 | 2.32E-72 | Hemopoetic_cells_II |
| Slpi    | 4.93E-77 | 4.89034816 | 0.924 | 0.137 | 2.73E-72 | Hemopoetic_cells_II |
| Hdc     | 9.25E-77 | 4.09871652 | 0.937 | 0.068 | 5.13E-72 | Hemopoetic_cells_II |
| Il1b    | 5.55E-74 | 6.05420934 | 0.899 | 0.021 | 3.07E-69 | Hemopoetic_cells_II |
| Grina   | 4.07E-73 | 3.27490485 | 0.911 | 0.404 | 2.26E-68 | Hemopoetic_cells_II |
| Mcl1    | 8.99E-73 | 2.99848614 | 0.975 | 0.615 | 4.98E-68 | Hemopoetic_cells_II |
| Trem1   | 3.36E-72 | 3.58033135 | 0.962 | 0.056 | 1.86E-67 | Hemopoetic_cells_II |
| Ccr1    | 3.29E-71 | 3.79297571 | 0.899 | 0.049 | 1.82E-66 | Hemopoetic_cells_II |
| Lmnb1   | 3.54E-66 | 3.56938076 | 0.949 | 0.154 | 1.96E-61 | Hemopoetic_cells_II |
| Hcar2   | 5.57E-65 | 4.0909905  | 0.886 | 0.053 | 3.08E-60 | Hemopoetic_cells_II |
| Clec4e  | 7.68E-65 | 3.98966993 | 0.911 | 0.049 | 4.25E-60 | Hemopoetic_cells_II |
| Tyrobp  | 1.24E-64 | 3.73668    | 0.975 | 0.137 | 6.85E-60 | Hemopoetic_cells_II |
| Nlrp3   | 1.17E-63 | 4.37416336 | 0.797 | 0.011 | 6.48E-59 | Hemopoetic_cells_II |
| Clec7a  | 8.52E-61 | 4.17676701 | 0.823 | 0.034 | 4.72E-56 | Hemopoetic_cells_II |
| Thbs1   | 8.84E-61 | 3.80349703 | 0.937 | 0.335 | 4.90E-56 | Hemopoetic_cells_II |
| Csf3r   | 1.05E-60 | 3.48140018 | 0.835 | 0.043 | 5.83E-56 | Hemopoetic_cells_II |
| Tpd52   | 5.18E-59 | 3.26118976 | 0.835 | 0.145 | 2.87E-54 | Hemopoetic_cells_II |
| Slc16a3 | 2.36E-58 | 3.45348775 | 0.823 | 0.06  | 1.31E-53 | Hemopoetic_cells_II |
| S100a8  | 2.87E-58 | 2.98499703 | 0.987 | 0.141 | 1.59E-53 | Hemopoetic_cells_II |
| Txn1    | 1.69E-57 | 2.23800497 | 0.975 | 0.684 | 9.39E-53 | Hemopoetic_cells_II |
| Adam8   | 9.01E-57 | 3.41605983 | 0.835 | 0.064 | 4.99E-52 | Hemopoetic_cells_II |
| Btg1    | 1.38E-55 | 2.68339957 | 0.987 | 0.797 | 7.67E-51 | Hemopoetic_cells_II |
| Ubc     | 4.19E-55 | 2.55052477 | 0.975 | 0.816 | 2.32E-50 | Hemopoetic_cells_II |
| Plek    | 5.76E-55 | 4.03633402 | 0.823 | 0.098 | 3.19E-50 | Hemopoetic_cells_II |
| G0s2    | 1.65E-54 | 4.20815846 | 0.873 | 0.103 | 9.16E-50 | Hemopoetic_cells_II |
| Cd44    | 2.60E-54 | 3.15030631 | 0.937 | 0.331 | 1.44E-49 | Hemopoetic_cells_II |
| S100a9  | 2.61E-54 | 3.18510418 | 0.962 | 0.171 | 1.45E-49 | Hemopoetic_cells_II |
| Cd14    | 2.92E-53 | 4.24569867 | 0.797 | 0.124 | 1.62E-48 | Hemopoetic_cells_II |
| Ndel1   | 5.46E-53 | 2.42889925 | 0.747 | 0.395 | 3.02E-48 | Hemopoetic_cells_II |
| Cstb    | 8.42E-53 | 3.15875883 | 0.785 | 0.412 | 4.66E-48 | Hemopoetic_cells_II |
| Rab7    | 2.12E-52 | 2.46519668 | 0.911 | 0.56  | 1.17E-47 | Hemopoetic_cells_II |
| Taldo1  | 3.36E-52 | 2.25997083 | 0.899 | 0.59  | 1.86E-47 | Hemopoetic_cells_II |
| Ftl1    | 9.97E-52 | 2.37950609 | 0.962 | 0.806 | 5.52E-47 | Hemopoetic_cells_II |
| Ccl6    | 1.59E-51 | 3.77731872 | 0.722 | 0.026 | 8.83E-47 | Hemopoetic_cells_II |
| Ptafr   | 1.90E-51 | 3.31094117 | 0.734 | 0.021 | 1.05E-46 | Hemopoetic_cells_II |
| Mxd1    | 6.25E-50 | 2.86738475 | 0.747 | 0.109 | 3.46E-45 | Hemopoetic_cells_II |
| Slc15a3 | 1.67E-49 | 2.87500552 | 0.709 | 0.034 | 9.26E-45 | Hemopoetic_cells_II |
| Ccr12   | 3.95E-49 | 4.10427128 | 0.747 | 0.085 | 2.19E-44 | Hemopoetic_cells_II |
| Samsn1  | 7.34E-49 | 2.77822927 | 0.873 | 0.113 | 4.07E-44 | Hemopoetic_cells_II |
| Ets2    | 8.49E-49 | 2.77291663 | 0.949 | 0.327 | 4.70E-44 | Hemopoetic_cells_II |
| Cyp4f18 | 1.18E-48 | 3.05856893 | 0.709 | 0.021 | 6.54E-44 | Hemopoetic_cells_II |

|          |          |            |       |       |          |                     |
|----------|----------|------------|-------|-------|----------|---------------------|
| Nfkbia   | 1.54E-48 | 3.05534098 | 0.911 | 0.566 | 8.51E-44 | Hemopoetic_cells_II |
| Arg2     | 4.58E-48 | 2.97828305 | 0.671 | 0.019 | 2.54E-43 | Hemopoetic_cells_II |
| Rnf149   | 6.19E-48 | 2.90353235 | 0.709 | 0.088 | 3.43E-43 | Hemopoetic_cells_II |
| lfrd1    | 7.04E-48 | 3.20905005 | 0.81  | 0.333 | 3.90E-43 | Hemopoetic_cells_II |
| S100a6   | 9.10E-48 | 3.12664654 | 0.949 | 0.532 | 5.04E-43 | Hemopoetic_cells_II |
| Pim1     | 1.06E-47 | 3.36075712 | 0.873 | 0.252 | 5.86E-43 | Hemopoetic_cells_II |
| Card19   | 1.36E-47 | 2.82583804 | 0.734 | 0.254 | 7.55E-43 | Hemopoetic_cells_II |
| Ninj1    | 5.98E-47 | 3.08967248 | 0.759 | 0.269 | 3.31E-42 | Hemopoetic_cells_II |
| Retnlg   | 6.36E-47 | 5.09094351 | 0.797 | 0.073 | 3.52E-42 | Hemopoetic_cells_II |
| Alox5ap  | 6.75E-47 | 2.75229496 | 0.886 | 0.113 | 3.74E-42 | Hemopoetic_cells_II |
| Gsr      | 2.78E-46 | 2.40744576 | 0.823 | 0.406 | 1.54E-41 | Hemopoetic_cells_II |
| Plaur    | 1.30E-45 | 2.89956032 | 0.861 | 0.214 | 7.19E-41 | Hemopoetic_cells_II |
| Ptprc    | 5.40E-45 | 2.70685244 | 0.873 | 0.132 | 2.99E-40 | Hemopoetic_cells_II |
| Cd53     | 6.87E-45 | 2.81989038 | 0.848 | 0.139 | 3.81E-40 | Hemopoetic_cells_II |
| Lsp1     | 1.27E-44 | 2.61434396 | 0.835 | 0.184 | 7.07E-40 | Hemopoetic_cells_II |
| Fcer1g   | 4.75E-43 | 2.57200446 | 0.937 | 0.321 | 2.63E-38 | Hemopoetic_cells_II |
| Stx11    | 6.41E-43 | 2.82919052 | 0.671 | 0.062 | 3.55E-38 | Hemopoetic_cells_II |
| Prdx5    | 1.36E-42 | 2.05850369 | 0.886 | 0.618 | 7.53E-38 | Hemopoetic_cells_II |
| Pnrc1    | 2.23E-42 | 2.1147655  | 0.886 | 0.579 | 1.23E-37 | Hemopoetic_cells_II |
| Emilin2  | 6.05E-42 | 2.45790397 | 0.633 | 0.03  | 3.35E-37 | Hemopoetic_cells_II |
| H3f3b    | 8.85E-42 | 1.86457824 | 0.975 | 0.897 | 4.91E-37 | Hemopoetic_cells_II |
| Mrpl33   | 1.73E-41 | 1.65769172 | 0.684 | 0.532 | 9.59E-37 | Hemopoetic_cells_II |
| Vps37b   | 2.02E-41 | 3.30159967 | 0.734 | 0.109 | 1.12E-36 | Hemopoetic_cells_II |
| Il1rn    | 3.92E-41 | 3.80682143 | 0.696 | 0.045 | 2.17E-36 | Hemopoetic_cells_II |
| Mmp9     | 4.22E-41 | 1.62365172 | 0.848 | 0.103 | 2.34E-36 | Hemopoetic_cells_II |
| Cxcr4    | 4.24E-41 | 3.22932401 | 0.772 | 0.124 | 2.35E-36 | Hemopoetic_cells_II |
| Rab8b    | 6.62E-41 | 2.42650651 | 0.734 | 0.276 | 3.67E-36 | Hemopoetic_cells_II |
| Cdk2ap2  | 1.06E-40 | 2.43515249 | 0.785 | 0.344 | 5.88E-36 | Hemopoetic_cells_II |
| Eif1     | 1.14E-40 | 1.56935076 | 0.975 | 0.88  | 6.32E-36 | Hemopoetic_cells_II |
| Ccl3     | 1.82E-40 | 4.61367284 | 0.722 | 0.062 | 1.01E-35 | Hemopoetic_cells_II |
| C5ar1    | 4.21E-40 | 2.82640663 | 0.734 | 0.081 | 2.33E-35 | Hemopoetic_cells_II |
| Cd52     | 4.42E-40 | 2.67454159 | 0.797 | 0.12  | 2.45E-35 | Hemopoetic_cells_II |
| Arpc3    | 6.79E-40 | 2.01806398 | 0.899 | 0.596 | 3.76E-35 | Hemopoetic_cells_II |
| Selenok  | 1.14E-39 | 1.63683017 | 0.861 | 0.782 | 6.32E-35 | Hemopoetic_cells_II |
| Antxr2   | 1.71E-39 | 2.06432561 | 0.671 | 0.382 | 9.50E-35 | Hemopoetic_cells_II |
| Pik3ap1  | 5.63E-39 | 2.7908406  | 0.62  | 0.053 | 3.12E-34 | Hemopoetic_cells_II |
| Lst1     | 1.72E-38 | 2.97553269 | 0.759 | 0.137 | 9.56E-34 | Hemopoetic_cells_II |
| Ncf2     | 2.01E-38 | 2.5113756  | 0.709 | 0.098 | 1.11E-33 | Hemopoetic_cells_II |
| Efh2     | 2.27E-38 | 2.49816777 | 0.81  | 0.233 | 1.26E-33 | Hemopoetic_cells_II |
| Tlr2     | 2.83E-38 | 2.83856522 | 0.646 | 0.075 | 1.57E-33 | Hemopoetic_cells_II |
| Rabgef1  | 8.69E-38 | 2.22176865 | 0.646 | 0.105 | 4.82E-33 | Hemopoetic_cells_II |
| Sorl1    | 1.27E-37 | 2.48428643 | 0.709 | 0.083 | 7.04E-33 | Hemopoetic_cells_II |
| Tgoln1   | 3.69E-37 | 1.98490575 | 0.696 | 0.498 | 2.04E-32 | Hemopoetic_cells_II |
| Pglyrp1  | 5.21E-37 | 2.38600529 | 0.772 | 0.083 | 2.89E-32 | Hemopoetic_cells_II |
| Map1lc3b | 7.28E-37 | 1.68244232 | 0.861 | 0.682 | 4.03E-32 | Hemopoetic_cells_II |
| Rac2     | 1.73E-36 | 2.19978992 | 0.873 | 0.162 | 9.58E-32 | Hemopoetic_cells_II |

|           |          |            |       |       |          |                     |
|-----------|----------|------------|-------|-------|----------|---------------------|
| Coro1a    | 8.91E-36 | 2.28345546 | 0.861 | 0.152 | 4.94E-31 | Hemopoetic_cells_II |
| Nfkbiz    | 8.98E-36 | 2.64353797 | 0.797 | 0.278 | 4.98E-31 | Hemopoetic_cells_II |
| Dgat1     | 2.57E-35 | 2.83439382 | 0.684 | 0.192 | 1.42E-30 | Hemopoetic_cells_II |
| Cd300lf   | 3.33E-35 | 2.30651237 | 0.62  | 0.045 | 1.84E-30 | Hemopoetic_cells_II |
| Bcl2l11   | 7.02E-35 | 2.37876503 | 0.57  | 0.145 | 3.89E-30 | Hemopoetic_cells_II |
| Tnfrsf1b  | 7.71E-35 | 2.50850001 | 0.608 | 0.103 | 4.27E-30 | Hemopoetic_cells_II |
| Lcp1      | 1.00E-34 | 2.07293235 | 0.873 | 0.259 | 5.56E-30 | Hemopoetic_cells_II |
| Vasp      | 1.28E-34 | 2.10167215 | 0.785 | 0.436 | 7.11E-30 | Hemopoetic_cells_II |
| Dusp1     | 2.07E-34 | 2.39214103 | 0.962 | 0.464 | 1.15E-29 | Hemopoetic_cells_II |
| Cd9       | 2.60E-34 | 1.82224706 | 0.937 | 0.765 | 1.44E-29 | Hemopoetic_cells_II |
| Trib1     | 2.66E-34 | 2.34063051 | 0.797 | 0.214 | 1.47E-29 | Hemopoetic_cells_II |
| Dedd2     | 2.68E-34 | 2.61635319 | 0.582 | 0.092 | 1.49E-29 | Hemopoetic_cells_II |
| Mcemp1    | 4.41E-34 | 2.26533904 | 0.696 | 0.066 | 2.44E-29 | Hemopoetic_cells_II |
| Smim3     | 4.46E-34 | 2.25694029 | 0.633 | 0.118 | 2.47E-29 | Hemopoetic_cells_II |
| Csf2ra    | 6.27E-34 | 2.00899078 | 0.671 | 0.126 | 3.48E-29 | Hemopoetic_cells_II |
| Mirt2     | 9.49E-34 | 2.09360339 | 0.506 | 0.011 | 5.26E-29 | Hemopoetic_cells_II |
| Il1f9     | 1.77E-33 | 2.91209434 | 0.506 | 0.009 | 9.80E-29 | Hemopoetic_cells_II |
| Cd33      | 4.57E-33 | 2.18471687 | 0.595 | 0.045 | 2.53E-28 | Hemopoetic_cells_II |
| Gadd45b   | 5.20E-33 | 2.55597766 | 0.823 | 0.432 | 2.88E-28 | Hemopoetic_cells_II |
| Prr13     | 9.46E-33 | 2.08094161 | 0.696 | 0.323 | 5.24E-28 | Hemopoetic_cells_II |
| Itgb2     | 1.03E-32 | 2.19176562 | 0.709 | 0.105 | 5.72E-28 | Hemopoetic_cells_II |
| Ehd1      | 1.64E-32 | 2.1402682  | 0.684 | 0.34  | 9.09E-28 | Hemopoetic_cells_II |
| Dazap2    | 2.12E-32 | 1.84073326 | 0.823 | 0.566 | 1.17E-27 | Hemopoetic_cells_II |
| Smox      | 2.30E-32 | 2.02326373 | 0.595 | 0.278 | 1.27E-27 | Hemopoetic_cells_II |
| Plk3      | 4.97E-32 | 2.3632877  | 0.671 | 0.137 | 2.76E-27 | Hemopoetic_cells_II |
| Sfn2      | 8.09E-32 | 2.61179837 | 0.696 | 0.13  | 4.48E-27 | Hemopoetic_cells_II |
| Kdm6b     | 9.52E-32 | 2.35283297 | 0.696 | 0.348 | 5.27E-27 | Hemopoetic_cells_II |
| Asprv1    | 1.26E-31 | 3.56906349 | 0.481 | 0.015 | 6.96E-27 | Hemopoetic_cells_II |
| Rab11fip1 | 1.40E-31 | 2.17951376 | 0.494 | 0.021 | 7.76E-27 | Hemopoetic_cells_II |
| Selenon   | 1.49E-31 | 2.01693583 | 0.671 | 0.301 | 8.26E-27 | Hemopoetic_cells_II |
| Ier5      | 2.14E-31 | 2.23682246 | 0.81  | 0.459 | 1.18E-26 | Hemopoetic_cells_II |
| Gmfg      | 2.16E-31 | 2.23748588 | 0.734 | 0.192 | 1.20E-26 | Hemopoetic_cells_II |
| Ifitm2    | 2.73E-31 | 1.88379074 | 0.722 | 0.6   | 1.52E-26 | Hemopoetic_cells_II |
| Tax1bp1   | 4.32E-31 | 1.65002968 | 0.671 | 0.519 | 2.39E-26 | Hemopoetic_cells_II |
| Fem1c     | 9.40E-31 | 1.89935779 | 0.608 | 0.177 | 5.21E-26 | Hemopoetic_cells_II |
| Syk       | 1.24E-30 | 2.34172944 | 0.608 | 0.096 | 6.89E-26 | Hemopoetic_cells_II |
| Tmsb4x    | 1.45E-30 | 1.76503229 | 1     | 0.932 | 8.01E-26 | Hemopoetic_cells_II |
| Snx20     | 1.73E-30 | 2.1348357  | 0.532 | 0.056 | 9.59E-26 | Hemopoetic_cells_II |
| Laptm5    | 2.05E-30 | 2.22690042 | 0.81  | 0.169 | 1.13E-25 | Hemopoetic_cells_II |
| Cd24a     | 2.08E-30 | 2.18026888 | 0.797 | 0.192 | 1.15E-25 | Hemopoetic_cells_II |
| Basp1     | 2.10E-30 | 3.37634388 | 0.557 | 0.132 | 1.17E-25 | Hemopoetic_cells_II |
| Map2k3    | 2.97E-30 | 1.73317272 | 0.646 | 0.37  | 1.65E-25 | Hemopoetic_cells_II |
| Cotl1     | 4.19E-30 | 1.99158106 | 0.797 | 0.35  | 2.32E-25 | Hemopoetic_cells_II |
| Themis2   | 7.96E-30 | 1.81517488 | 0.532 | 0.038 | 4.41E-25 | Hemopoetic_cells_II |
| Cd300ld   | 9.88E-30 | 2.03781577 | 0.456 | 0.013 | 5.47E-25 | Hemopoetic_cells_II |
| Sh2d3c    | 1.76E-29 | 1.95815105 | 0.557 | 0.143 | 9.75E-25 | Hemopoetic_cells_II |

|          |          |            |       |       |          |                     |
|----------|----------|------------|-------|-------|----------|---------------------|
| Fmn1     | 3.36E-29 | 1.93066935 | 0.608 | 0.098 | 1.86E-24 | Hemopoetic_cells_II |
| Anxa11   | 5.95E-29 | 1.64241616 | 0.608 | 0.331 | 3.30E-24 | Hemopoetic_cells_II |
| Mapkapk2 | 7.58E-29 | 1.82789898 | 0.633 | 0.4   | 4.20E-24 | Hemopoetic_cells_II |
| Wfdc21   | 9.08E-29 | 2.39321629 | 0.646 | 0.075 | 5.03E-24 | Hemopoetic_cells_II |
| Atp6v1e1 | 1.09E-28 | 1.75687923 | 0.646 | 0.502 | 6.04E-24 | Hemopoetic_cells_II |
| Pla2g7   | 1.44E-28 | 2.34216125 | 0.519 | 0.032 | 7.98E-24 | Hemopoetic_cells_II |
| Slc9a3r1 | 1.46E-28 | 2.10859563 | 0.557 | 0.115 | 8.07E-24 | Hemopoetic_cells_II |
| Lasp1    | 1.57E-28 | 1.84014311 | 0.709 | 0.472 | 8.70E-24 | Hemopoetic_cells_II |
| H2-Q10   | 1.79E-28 | 2.1919859  | 0.456 | 0.024 | 9.90E-24 | Hemopoetic_cells_II |
| Osgin1   | 2.30E-28 | 2.05399177 | 0.532 | 0.041 | 1.28E-23 | Hemopoetic_cells_II |
| Iqgap1   | 2.70E-28 | 1.5677719  | 0.785 | 0.558 | 1.50E-23 | Hemopoetic_cells_II |
| Tgfb1    | 3.52E-28 | 1.98445989 | 0.633 | 0.103 | 1.95E-23 | Hemopoetic_cells_II |
| Trem3    | 3.85E-28 | 1.91527766 | 0.608 | 0.062 | 2.13E-23 | Hemopoetic_cells_II |
| Mmp8     | 1.07E-27 | 2.74643465 | 0.557 | 0.041 | 5.92E-23 | Hemopoetic_cells_II |
| Tnfaip2  | 1.15E-27 | 2.30548319 | 0.608 | 0.321 | 6.40E-23 | Hemopoetic_cells_II |
| Jdp2     | 1.36E-27 | 1.93562962 | 0.633 | 0.291 | 7.53E-23 | Hemopoetic_cells_II |
| Osm      | 3.39E-27 | 1.99323969 | 0.633 | 0.073 | 1.88E-22 | Hemopoetic_cells_II |
| Cox17    | 5.53E-27 | 1.72614458 | 0.557 | 0.318 | 3.07E-22 | Hemopoetic_cells_II |
| Gm20406  | 8.98E-27 | 2.29426442 | 0.506 | 0.038 | 4.98E-22 | Hemopoetic_cells_II |
| Bcl2a1b  | 1.14E-26 | 2.65227445 | 0.468 | 0.032 | 6.29E-22 | Hemopoetic_cells_II |
| Pilra    | 1.25E-26 | 1.95637352 | 0.582 | 0.079 | 6.92E-22 | Hemopoetic_cells_II |
| Cyba     | 1.27E-26 | 1.52245646 | 0.886 | 0.682 | 7.03E-22 | Hemopoetic_cells_II |
| Gla      | 1.93E-26 | 1.89146857 | 0.481 | 0.06  | 1.07E-21 | Hemopoetic_cells_II |
| Adipor1  | 2.42E-26 | 1.68630211 | 0.658 | 0.442 | 1.34E-21 | Hemopoetic_cells_II |
| Kpna4    | 2.76E-26 | 1.74323944 | 0.62  | 0.276 | 1.53E-21 | Hemopoetic_cells_II |
| Nr4a3    | 2.87E-26 | 2.23969456 | 0.481 | 0.051 | 1.59E-21 | Hemopoetic_cells_II |
| Tnfaip3  | 3.18E-26 | 2.57859393 | 0.595 | 0.115 | 1.76E-21 | Hemopoetic_cells_II |
| Resf1    | 3.23E-26 | 1.8557602  | 0.658 | 0.395 | 1.79E-21 | Hemopoetic_cells_II |
| Slc2a3   | 5.28E-26 | 2.24983547 | 0.544 | 0.066 | 2.92E-21 | Hemopoetic_cells_II |
| Cstdc4   | 8.71E-26 | 3.69951749 | 0.367 | 0.002 | 4.83E-21 | Hemopoetic_cells_II |
| Ankrd33b | 1.10E-25 | 1.96993765 | 0.456 | 0.047 | 6.10E-21 | Hemopoetic_cells_II |
| Irak2    | 1.16E-25 | 2.09937153 | 0.456 | 0.051 | 6.44E-21 | Hemopoetic_cells_II |
| Ifitm1   | 1.32E-25 | 2.91209163 | 0.519 | 0.156 | 7.30E-21 | Hemopoetic_cells_II |
| Hp       | 1.49E-25 | 1.79187791 | 0.734 | 0.145 | 8.24E-21 | Hemopoetic_cells_II |
| Nfe2l2   | 1.84E-25 | 1.92751889 | 0.633 | 0.37  | 1.02E-20 | Hemopoetic_cells_II |
| Hilpda   | 3.88E-25 | 2.12627366 | 0.392 | 0.229 | 2.15E-20 | Hemopoetic_cells_II |
| Tgm2     | 3.89E-25 | 2.2654501  | 0.658 | 0.278 | 2.16E-20 | Hemopoetic_cells_II |
| Tgif1    | 4.75E-25 | 2.07933078 | 0.494 | 0.16  | 2.63E-20 | Hemopoetic_cells_II |
| Rab20    | 6.84E-25 | 2.04618052 | 0.519 | 0.073 | 3.79E-20 | Hemopoetic_cells_II |
| Gfod1    | 7.14E-25 | 1.88409781 | 0.443 | 0.1   | 3.96E-20 | Hemopoetic_cells_II |
| Fxyd5    | 1.07E-24 | 1.83707286 | 0.646 | 0.288 | 5.91E-20 | Hemopoetic_cells_II |
| Glrx     | 1.50E-24 | 1.88773288 | 0.62  | 0.16  | 8.33E-20 | Hemopoetic_cells_II |
| Marcksl1 | 2.16E-24 | 2.58423865 | 0.722 | 0.387 | 1.20E-19 | Hemopoetic_cells_II |
| Stfa2l1  | 2.30E-24 | 3.03924933 | 0.38  | 0.009 | 1.28E-19 | Hemopoetic_cells_II |
| Zfp36    | 3.64E-24 | 2.00734034 | 0.861 | 0.483 | 2.02E-19 | Hemopoetic_cells_II |
| Spi1     | 4.82E-24 | 1.92792803 | 0.633 | 0.109 | 2.67E-19 | Hemopoetic_cells_II |

|             |          |            |       |       |          |                     |
|-------------|----------|------------|-------|-------|----------|---------------------|
| Hcst        | 6.62E-24 | 1.78883341 | 0.608 | 0.109 | 3.67E-19 | Hemopoetic_cells_II |
| Lgals3      | 8.70E-24 | 1.92773671 | 0.684 | 0.143 | 4.82E-19 | Hemopoetic_cells_II |
| 2310001H17f | 3.32E-23 | 1.72091541 | 0.418 | 0.032 | 1.84E-18 | Hemopoetic_cells_II |
| Vegfa       | 4.36E-23 | 1.84723315 | 0.506 | 0.327 | 2.42E-18 | Hemopoetic_cells_II |
| Pde4b       | 5.03E-23 | 2.08559188 | 0.582 | 0.12  | 2.79E-18 | Hemopoetic_cells_II |
| Retreg1     | 5.51E-23 | 1.95265837 | 0.519 | 0.109 | 3.05E-18 | Hemopoetic_cells_II |
| Sell        | 7.92E-23 | 2.16411918 | 0.506 | 0.064 | 4.39E-18 | Hemopoetic_cells_II |
| Rhog        | 2.32E-22 | 1.50578137 | 0.519 | 0.259 | 1.29E-17 | Hemopoetic_cells_II |
| Lrrc25      | 2.76E-22 | 1.61027972 | 0.405 | 0.053 | 1.53E-17 | Hemopoetic_cells_II |
| Hcls1       | 2.99E-22 | 1.59819557 | 0.633 | 0.169 | 1.66E-17 | Hemopoetic_cells_II |
| Dusp5       | 3.47E-22 | 2.33544776 | 0.544 | 0.128 | 1.92E-17 | Hemopoetic_cells_II |
| Sephs2      | 4.26E-22 | 1.61937758 | 0.456 | 0.184 | 2.36E-17 | Hemopoetic_cells_II |
| Chd7        | 1.21E-21 | 1.7618741  | 0.456 | 0.165 | 6.71E-17 | Hemopoetic_cells_II |
| Inpp5d      | 2.13E-21 | 1.70577025 | 0.532 | 0.147 | 1.18E-16 | Hemopoetic_cells_II |
| lfi27l2a    | 3.44E-21 | 2.65498135 | 0.544 | 0.083 | 1.91E-16 | Hemopoetic_cells_II |
| Sat1        | 4.02E-21 | 1.69207675 | 0.835 | 0.434 | 2.23E-16 | Hemopoetic_cells_II |
| Plbd1       | 4.22E-21 | 1.68942179 | 0.608 | 0.105 | 2.34E-16 | Hemopoetic_cells_II |
| Rdh12       | 5.71E-21 | 1.60950863 | 0.354 | 0.019 | 3.16E-16 | Hemopoetic_cells_II |
| Rhov        | 6.97E-21 | 1.53165575 | 0.291 | 0.002 | 3.86E-16 | Hemopoetic_cells_II |
| 1700017B05F | 1.14E-20 | 1.66813955 | 0.405 | 0.098 | 6.33E-16 | Hemopoetic_cells_II |
| Rasa2       | 2.10E-20 | 1.83245288 | 0.494 | 0.205 | 1.16E-15 | Hemopoetic_cells_II |
| Lyst        | 2.41E-20 | 1.60578956 | 0.506 | 0.218 | 1.33E-15 | Hemopoetic_cells_II |
| Suco        | 2.41E-20 | 1.69050604 | 0.519 | 0.207 | 1.34E-15 | Hemopoetic_cells_II |
| Marchf7     | 2.69E-20 | 1.5448417  | 0.532 | 0.316 | 1.49E-15 | Hemopoetic_cells_II |
| Hdac4       | 4.27E-20 | 1.63328215 | 0.456 | 0.169 | 2.37E-15 | Hemopoetic_cells_II |
| Ncf4        | 7.24E-20 | 1.59936752 | 0.519 | 0.094 | 4.01E-15 | Hemopoetic_cells_II |
| Lfng        | 8.23E-20 | 1.81127611 | 0.43  | 0.16  | 4.56E-15 | Hemopoetic_cells_II |
| Zswim4      | 1.00E-19 | 1.59236872 | 0.342 | 0.071 | 5.56E-15 | Hemopoetic_cells_II |
| Selplg      | 1.06E-19 | 1.66284124 | 0.418 | 0.06  | 5.88E-15 | Hemopoetic_cells_II |
| Rilpl2      | 1.60E-19 | 1.87346887 | 0.367 | 0.184 | 8.87E-15 | Hemopoetic_cells_II |
| Pygl        | 2.39E-19 | 1.7120359  | 0.494 | 0.077 | 1.33E-14 | Hemopoetic_cells_II |
| Il17ra      | 2.80E-19 | 1.5195927  | 0.405 | 0.083 | 1.55E-14 | Hemopoetic_cells_II |
| Fosl2       | 2.92E-19 | 1.68594567 | 0.658 | 0.316 | 1.62E-14 | Hemopoetic_cells_II |
| Zc3h12a     | 7.35E-19 | 2.00716138 | 0.456 | 0.098 | 4.07E-14 | Hemopoetic_cells_II |
| Snx18       | 9.35E-19 | 1.50407792 | 0.582 | 0.231 | 5.18E-14 | Hemopoetic_cells_II |
| Entpd1      | 1.83E-18 | 1.77907494 | 0.443 | 0.137 | 1.02E-13 | Hemopoetic_cells_II |
| Ptk2b       | 2.36E-18 | 1.77748964 | 0.367 | 0.064 | 1.31E-13 | Hemopoetic_cells_II |
| Tnf         | 2.90E-18 | 2.39063114 | 0.456 | 0.068 | 1.61E-13 | Hemopoetic_cells_II |
| Fgd3        | 3.11E-18 | 1.60433272 | 0.304 | 0.034 | 1.72E-13 | Hemopoetic_cells_II |
| Zfp263      | 4.29E-18 | 1.54774453 | 0.316 | 0.137 | 2.38E-13 | Hemopoetic_cells_II |
| Prdx6       | 5.71E-18 | 1.56290377 | 0.658 | 0.457 | 3.16E-13 | Hemopoetic_cells_II |
| Ezr         | 2.38E-17 | 1.54290817 | 0.481 | 0.188 | 1.32E-12 | Hemopoetic_cells_II |
| Sqstm1      | 2.52E-17 | 1.50728253 | 0.392 | 0.436 | 1.40E-12 | Hemopoetic_cells_II |
| Cytip       | 3.30E-17 | 1.64241095 | 0.43  | 0.071 | 1.83E-12 | Hemopoetic_cells_II |
| Tiparp      | 3.77E-17 | 1.72534791 | 0.532 | 0.261 | 2.09E-12 | Hemopoetic_cells_II |
| Slc7a11     | 4.09E-17 | 1.53973764 | 0.304 | 0.013 | 2.27E-12 | Hemopoetic_cells_II |



|          |           |            |       |       |           |                               |
|----------|-----------|------------|-------|-------|-----------|-------------------------------|
| Mreg     | 4.69E-17  | 2.07130288 | 0.278 | 0.013 | 2.60E-12  | Hemopoetic_cells_II           |
| Ccl4     | 4.95E-17  | 3.16699059 | 0.443 | 0.058 | 2.74E-12  | Hemopoetic_cells_II           |
| AB124611 | 5.94E-17  | 1.54508115 | 0.456 | 0.092 | 3.29E-12  | Hemopoetic_cells_II           |
| Gadd45a  | 6.07E-17  | 1.59480567 | 0.633 | 0.188 | 3.36E-12  | Hemopoetic_cells_II           |
| Birc3    | 8.21E-17  | 1.66797353 | 0.38  | 0.1   | 4.55E-12  | Hemopoetic_cells_II           |
| Neurl3   | 1.03E-16  | 1.81654065 | 0.367 | 0.049 | 5.73E-12  | Hemopoetic_cells_II           |
| Nfkbid   | 1.05E-16  | 1.67294072 | 0.405 | 0.071 | 5.80E-12  | Hemopoetic_cells_II           |
| Gda      | 4.11E-16  | 1.53339551 | 0.519 | 0.192 | 2.28E-11  | Hemopoetic_cells_II           |
| Ptgs2    | 5.80E-16  | 2.04151873 | 0.304 | 0.038 | 3.21E-11  | Hemopoetic_cells_II           |
| Rgs2     | 6.90E-16  | 1.68147567 | 0.62  | 0.361 | 3.83E-11  | Hemopoetic_cells_II           |
| Rel      | 9.36E-16  | 1.85159241 | 0.405 | 0.173 | 5.19E-11  | Hemopoetic_cells_II           |
| Fpr1     | 1.28E-15  | 1.65397168 | 0.316 | 0.024 | 7.11E-11  | Hemopoetic_cells_II           |
| Bhlhe40  | 1.64E-15  | 1.57739637 | 0.532 | 0.288 | 9.10E-11  | Hemopoetic_cells_II           |
| H2az1    | 4.50E-30  | 1.766476   | 0.637 | 0.312 | 2.49E-25  | Hemopoetic_cells_I            |
| Cybb     | 8.28E-29  | 3.03963607 | 0.51  | 0.056 | 4.59E-24  | Hemopoetic_cells_I            |
| Chil3    | 5.49E-25  | 4.09821122 | 0.343 | 0.011 | 3.05E-20  | Hemopoetic_cells_I            |
| Gpx1     | 1.14E-22  | 1.62903716 | 0.873 | 0.622 | 6.30E-18  | Hemopoetic_cells_I            |
| Ltf      | 3.68E-22  | 3.51742142 | 0.284 | 0.013 | 2.04E-17  | Hemopoetic_cells_I            |
| Ptpn18   | 3.68E-22  | 1.58402554 | 0.618 | 0.146 | 2.04E-17  | Hemopoetic_cells_I            |
| Tkt      | 5.28E-22  | 1.72660827 | 0.676 | 0.407 | 2.92E-17  | Hemopoetic_cells_I            |
| Hmgb2    | 5.72E-22  | 2.07935635 | 0.716 | 0.344 | 3.17E-17  | Hemopoetic_cells_I            |
| Arhgdib  | 1.23E-21  | 1.94924761 | 0.716 | 0.24  | 6.81E-17  | Hemopoetic_cells_I            |
| Coro1a   | 2.13E-21  | 1.60303314 | 0.657 | 0.162 | 1.18E-16  | Hemopoetic_cells_I            |
| Cd74     | 9.94E-21  | 2.84919195 | 0.294 | 0.007 | 5.51E-16  | Hemopoetic_cells_I            |
| Camp     | 1.75E-20  | 6.21131503 | 0.363 | 0.058 | 9.69E-16  | Hemopoetic_cells_I            |
| Clec12a  | 2.24E-19  | 1.53144918 | 0.373 | 0.031 | 1.24E-14  | Hemopoetic_cells_I            |
| Mki67    | 8.50E-18  | 1.91602355 | 0.324 | 0.025 | 4.71E-13  | Hemopoetic_cells_I            |
| Ngp      | 1.19E-17  | 5.01470869 | 0.314 | 0.076 | 6.61E-13  | Hemopoetic_cells_I            |
| Ighm     | 1.53E-17  | 2.29795404 | 0.304 | 0.031 | 8.46E-13  | Hemopoetic_cells_I            |
| Birc5    | 1.77E-17  | 1.54245633 | 0.245 | 0.007 | 9.78E-13  | Hemopoetic_cells_I            |
| Plac8    | 2.70E-17  | 2.29557516 | 0.382 | 0.065 | 1.50E-12  | Hemopoetic_cells_I            |
| Top2a    | 2.86E-17  | 1.74393053 | 0.275 | 0.016 | 1.59E-12  | Hemopoetic_cells_I            |
| H2-Ab1   | 1.19E-16  | 3.16433898 | 0.314 | 0.036 | 6.58E-12  | Hemopoetic_cells_I            |
| Ctss     | 2.12E-16  | 2.04839286 | 0.294 | 0.02  | 1.18E-11  | Hemopoetic_cells_I            |
| Lyz2     | 7.76E-16  | 3.0399075  | 0.549 | 0.18  | 4.30E-11  | Hemopoetic_cells_I            |
| Stmn1    | 1.50E-15  | 1.89266974 | 0.333 | 0.09  | 8.32E-11  | Hemopoetic_cells_I            |
| Cdh5     | 1.29E-107 | 3.9470637  | 0.972 | 0.014 | 7.16E-103 | Bone marrow endothelial cells |
| Plvap    | 6.27E-104 | 4.09682951 | 0.953 | 0.036 | 3.48E-99  | Bone marrow endothelial cells |
| Ptprb    | 1.12E-101 | 3.65970704 | 0.953 | 0.007 | 6.21E-97  | Bone marrow endothelial cells |
| Sox18    | 1.19E-100 | 3.5804856  | 0.943 | 0.014 | 6.59E-96  | Bone marrow endothelial cells |
| Esam     | 1.16E-99  | 3.36955146 | 0.972 | 0.018 | 6.44E-95  | Bone marrow endothelial cells |
| Pecam1   | 1.75E-99  | 3.35685611 | 0.972 | 0.016 | 9.71E-95  | Bone marrow endothelial cells |
| Mmrn2    | 5.22E-97  | 2.91393495 | 0.934 | 0.007 | 2.89E-92  | Bone marrow endothelial cells |
| Tie1     | 2.05E-94  | 2.67116947 | 0.934 | 0.011 | 1.14E-89  | Bone marrow endothelial cells |
| Egfl7    | 4.76E-94  | 3.14008023 | 0.925 | 0.009 | 2.64E-89  | Bone marrow endothelial cells |
| Kdr      | 3.60E-93  | 3.40613254 | 0.925 | 0.014 | 2.00E-88  | Bone marrow endothelial cells |

|          |          |            |       |       |          |                               |
|----------|----------|------------|-------|-------|----------|-------------------------------|
| Eng      | 7.31E-90 | 3.34354008 | 0.962 | 0.136 | 4.05E-85 | Bone marrow endothelial cells |
| Cldn5    | 2.71E-89 | 4.31608054 | 0.906 | 0.011 | 1.50E-84 | Bone marrow endothelial cells |
| Rasip1   | 4.03E-89 | 2.38497293 | 0.953 | 0.027 | 2.23E-84 | Bone marrow endothelial cells |
| Emcn     | 2.48E-88 | 2.97380724 | 0.887 | 0.007 | 1.38E-83 | Bone marrow endothelial cells |
| Flt1     | 4.34E-88 | 2.98676068 | 0.887 | 0.007 | 2.40E-83 | Bone marrow endothelial cells |
| Ecsr     | 1.12E-86 | 2.5277791  | 0.887 | 0.016 | 6.23E-82 | Bone marrow endothelial cells |
| F11r     | 4.08E-86 | 2.37732416 | 0.877 | 0.02  | 2.26E-81 | Bone marrow endothelial cells |
| Ly6a     | 6.22E-83 | 3.95806914 | 0.906 | 0.036 | 3.45E-78 | Bone marrow endothelial cells |
| Gng11    | 6.72E-83 | 3.20956388 | 0.953 | 0.308 | 3.72E-78 | Bone marrow endothelial cells |
| Ushbp1   | 2.74E-82 | 2.1931432  | 0.83  | 0.002 | 1.52E-77 | Bone marrow endothelial cells |
| Cd93     | 2.13E-81 | 2.94644321 | 0.962 | 0.091 | 1.18E-76 | Bone marrow endothelial cells |
| Podxl    | 2.32E-77 | 3.01504293 | 0.792 | 0.002 | 1.29E-72 | Bone marrow endothelial cells |
| Tcim     | 7.58E-77 | 3.58009375 | 0.858 | 0.034 | 4.20E-72 | Bone marrow endothelial cells |
| Ldb2     | 9.72E-75 | 2.21495619 | 0.821 | 0.016 | 5.39E-70 | Bone marrow endothelial cells |
| Ets1     | 1.04E-74 | 2.69437825 | 0.943 | 0.168 | 5.78E-70 | Bone marrow endothelial cells |
| Icam2    | 1.94E-74 | 2.62345053 | 0.849 | 0.032 | 1.08E-69 | Bone marrow endothelial cells |
| Adgrl4   | 3.35E-72 | 2.07052863 | 0.792 | 0.009 | 1.86E-67 | Bone marrow endothelial cells |
| Myct1    | 1.43E-71 | 2.20971349 | 0.811 | 0.016 | 7.90E-67 | Bone marrow endothelial cells |
| Tek      | 4.16E-71 | 2.03129646 | 0.764 | 0.005 | 2.30E-66 | Bone marrow endothelial cells |
| Npr1     | 2.55E-70 | 2.17447172 | 0.792 | 0.016 | 1.42E-65 | Bone marrow endothelial cells |
| Robo4    | 7.18E-70 | 2.07412049 | 0.755 | 0.005 | 3.98E-65 | Bone marrow endothelial cells |
| Cd81     | 1.15E-69 | 2.46724925 | 0.972 | 0.533 | 6.35E-65 | Bone marrow endothelial cells |
| Epas1    | 1.03E-68 | 2.73021914 | 0.972 | 0.186 | 5.68E-64 | Bone marrow endothelial cells |
| Sptbn1   | 2.03E-68 | 2.41885348 | 0.972 | 0.376 | 1.12E-63 | Bone marrow endothelial cells |
| Ctla2a   | 2.43E-68 | 3.51066372 | 0.811 | 0.027 | 1.35E-63 | Bone marrow endothelial cells |
| Clec14a  | 1.18E-67 | 2.68718781 | 0.811 | 0.029 | 6.53E-63 | Bone marrow endothelial cells |
| Fam167b  | 1.29E-67 | 2.29907643 | 0.745 | 0.009 | 7.13E-63 | Bone marrow endothelial cells |
| Fkbp1a   | 1.33E-67 | 2.20890014 | 0.934 | 0.449 | 7.38E-63 | Bone marrow endothelial cells |
| Adgrf5   | 1.86E-66 | 2.36895824 | 0.915 | 0.102 | 1.03E-61 | Bone marrow endothelial cells |
| Slc9a3r2 | 1.62E-64 | 3.05664499 | 0.821 | 0.104 | 8.98E-60 | Bone marrow endothelial cells |
| Tm4sf1   | 3.12E-64 | 3.49514761 | 0.896 | 0.229 | 1.73E-59 | Bone marrow endothelial cells |
| Col4a1   | 3.85E-64 | 2.93910665 | 0.906 | 0.093 | 2.13E-59 | Bone marrow endothelial cells |
| Rapgef5  | 5.46E-64 | 1.87547772 | 0.717 | 0.007 | 3.03E-59 | Bone marrow endothelial cells |
| Arhgef15 | 1.05E-63 | 1.77456703 | 0.717 | 0.007 | 5.83E-59 | Bone marrow endothelial cells |
| Flt4     | 3.85E-63 | 2.39601201 | 0.698 | 0.007 | 2.13E-58 | Bone marrow endothelial cells |
| Fgd5     | 5.59E-63 | 1.76118192 | 0.736 | 0.018 | 3.10E-58 | Bone marrow endothelial cells |
| Cavin3   | 6.38E-63 | 2.37553309 | 0.934 | 0.265 | 3.53E-58 | Bone marrow endothelial cells |
| Ece1     | 7.37E-63 | 2.22329273 | 0.906 | 0.193 | 4.08E-58 | Bone marrow endothelial cells |
| Ly6e     | 9.52E-63 | 2.50354202 | 0.981 | 0.265 | 5.28E-58 | Bone marrow endothelial cells |
| Ccdc85b  | 1.17E-62 | 2.22823805 | 0.868 | 0.24  | 6.49E-58 | Bone marrow endothelial cells |
| Jup      | 1.53E-62 | 2.12003582 | 0.83  | 0.118 | 8.47E-58 | Bone marrow endothelial cells |
| Mcam     | 2.65E-61 | 2.23240325 | 0.764 | 0.025 | 1.47E-56 | Bone marrow endothelial cells |
| Elk3     | 1.18E-60 | 2.14903504 | 0.849 | 0.197 | 6.52E-56 | Bone marrow endothelial cells |
| Col4a2   | 3.76E-60 | 2.9351353  | 0.858 | 0.084 | 2.09E-55 | Bone marrow endothelial cells |
| Arhgap29 | 1.18E-59 | 1.85400134 | 0.783 | 0.039 | 6.55E-55 | Bone marrow endothelial cells |
| Plpp3    | 2.72E-59 | 2.36937354 | 0.906 | 0.109 | 1.51E-54 | Bone marrow endothelial cells |

|             |          |            |       |       |          |                               |
|-------------|----------|------------|-------|-------|----------|-------------------------------|
| Cavin2      | 4.49E-59 | 2.33272253 | 0.679 | 0.009 | 2.49E-54 | Bone marrow endothelial cells |
| Thbd        | 7.32E-59 | 2.49703341 | 0.745 | 0.034 | 4.06E-54 | Bone marrow endothelial cells |
| Cd34        | 3.66E-57 | 2.77997977 | 0.708 | 0.023 | 2.03E-52 | Bone marrow endothelial cells |
| She         | 4.31E-57 | 1.58066828 | 0.66  | 0.009 | 2.39E-52 | Bone marrow endothelial cells |
| Plpp1       | 5.04E-57 | 2.21836968 | 0.906 | 0.132 | 2.79E-52 | Bone marrow endothelial cells |
| Fabp4       | 7.98E-57 | 5.0919154  | 0.708 | 0.032 | 4.42E-52 | Bone marrow endothelial cells |
| Plxnd1      | 8.37E-57 | 2.33526766 | 0.906 | 0.177 | 4.64E-52 | Bone marrow endothelial cells |
| Slfn5       | 3.01E-56 | 2.14892774 | 0.868 | 0.093 | 1.67E-51 | Bone marrow endothelial cells |
| Rasgrp3     | 1.24E-55 | 1.52466592 | 0.632 | 0.005 | 6.90E-51 | Bone marrow endothelial cells |
| Crip2       | 5.43E-55 | 2.2193365  | 0.915 | 0.311 | 3.01E-50 | Bone marrow endothelial cells |
| Btnl9       | 8.40E-55 | 2.17010206 | 0.613 | 0.002 | 4.65E-50 | Bone marrow endothelial cells |
| Timp3       | 8.87E-55 | 2.52936426 | 0.915 | 0.195 | 4.91E-50 | Bone marrow endothelial cells |
| Adgrg1      | 9.31E-55 | 1.53676376 | 0.66  | 0.016 | 5.16E-50 | Bone marrow endothelial cells |
| Shank3      | 9.64E-55 | 1.50304355 | 0.67  | 0.014 | 5.34E-50 | Bone marrow endothelial cells |
| Hspb1       | 1.40E-54 | 2.6597172  | 0.811 | 0.066 | 7.78E-50 | Bone marrow endothelial cells |
| Rhoj        | 1.43E-54 | 1.77218535 | 0.783 | 0.059 | 7.95E-50 | Bone marrow endothelial cells |
| Ehd2        | 1.79E-53 | 1.93127055 | 0.774 | 0.07  | 9.92E-49 | Bone marrow endothelial cells |
| Dll4        | 2.74E-53 | 1.93249814 | 0.613 | 0.005 | 1.52E-48 | Bone marrow endothelial cells |
| Tmem88      | 5.89E-53 | 1.66443157 | 0.66  | 0.02  | 3.26E-48 | Bone marrow endothelial cells |
| Itga6       | 1.38E-52 | 1.73593642 | 0.679 | 0.025 | 7.67E-48 | Bone marrow endothelial cells |
| Ltbp4       | 2.79E-52 | 2.9027576  | 0.717 | 0.043 | 1.55E-47 | Bone marrow endothelial cells |
| Igfbp7      | 4.34E-52 | 2.70328338 | 0.915 | 0.17  | 2.41E-47 | Bone marrow endothelial cells |
| Tcf4        | 1.06E-51 | 1.89771192 | 0.981 | 0.465 | 5.85E-47 | Bone marrow endothelial cells |
| Cracr2b     | 1.72E-51 | 1.65541559 | 0.67  | 0.032 | 9.53E-47 | Bone marrow endothelial cells |
| Prex2       | 4.45E-51 | 1.65918499 | 0.594 | 0.005 | 2.47E-46 | Bone marrow endothelial cells |
| C130074G19I | 6.88E-51 | 1.64858989 | 0.651 | 0.018 | 3.81E-46 | Bone marrow endothelial cells |
| Pcdh17      | 1.14E-50 | 1.75803136 | 0.632 | 0.014 | 6.32E-46 | Bone marrow endothelial cells |
| Fzd4        | 3.23E-50 | 1.60989725 | 0.736 | 0.054 | 1.79E-45 | Bone marrow endothelial cells |
| Selenop     | 7.36E-50 | 2.954117   | 0.925 | 0.417 | 4.08E-45 | Bone marrow endothelial cells |
| Cmtm8       | 8.25E-50 | 1.72965999 | 0.632 | 0.025 | 4.57E-45 | Bone marrow endothelial cells |
| Sox17       | 9.43E-50 | 2.03903183 | 0.585 | 0.007 | 5.22E-45 | Bone marrow endothelial cells |
| Calcr1      | 2.50E-49 | 1.70461827 | 0.679 | 0.039 | 1.38E-44 | Bone marrow endothelial cells |
| Cd300lg     | 3.44E-48 | 2.11942045 | 0.66  | 0.029 | 1.91E-43 | Bone marrow endothelial cells |
| Abcg2       | 5.82E-48 | 1.63041288 | 0.689 | 0.059 | 3.22E-43 | Bone marrow endothelial cells |
| Stab1       | 1.84E-47 | 1.81243798 | 0.651 | 0.025 | 1.02E-42 | Bone marrow endothelial cells |
| Hspg2       | 2.22E-47 | 1.91537068 | 0.934 | 0.472 | 1.23E-42 | Bone marrow endothelial cells |
| Gimap4      | 7.06E-47 | 1.58255663 | 0.604 | 0.014 | 3.91E-42 | Bone marrow endothelial cells |
| 2900026A02f | 2.43E-46 | 1.58493915 | 0.755 | 0.088 | 1.35E-41 | Bone marrow endothelial cells |
| Cd38        | 4.46E-46 | 1.6170629  | 0.623 | 0.02  | 2.47E-41 | Bone marrow endothelial cells |
| Serpnb6a    | 1.99E-45 | 1.92700528 | 0.896 | 0.32  | 1.10E-40 | Bone marrow endothelial cells |
| Cyb5a       | 2.98E-45 | 1.73165146 | 0.896 | 0.277 | 1.65E-40 | Bone marrow endothelial cells |
| Arap3       | 3.10E-45 | 1.63974896 | 0.708 | 0.07  | 1.72E-40 | Bone marrow endothelial cells |
| Ifitm3      | 3.29E-45 | 1.93172165 | 0.981 | 0.66  | 1.82E-40 | Bone marrow endothelial cells |
| Notch4      | 6.38E-45 | 1.59856067 | 0.623 | 0.043 | 3.54E-40 | Bone marrow endothelial cells |
| Slc43a3     | 4.08E-44 | 1.57291727 | 0.67  | 0.05  | 2.26E-39 | Bone marrow endothelial cells |
| Cav1        | 5.91E-44 | 1.85351358 | 0.585 | 0.018 | 3.28E-39 | Bone marrow endothelial cells |

|          |          |            |       |       |          |                               |
|----------|----------|------------|-------|-------|----------|-------------------------------|
| Crim1    | 9.17E-44 | 1.72473586 | 0.783 | 0.175 | 5.08E-39 | Bone marrow endothelial cells |
| Pdgfb    | 1.73E-43 | 2.00171617 | 0.642 | 0.043 | 9.57E-39 | Bone marrow endothelial cells |
| Bvht     | 1.15E-42 | 1.53695804 | 0.632 | 0.088 | 6.39E-38 | Bone marrow endothelial cells |
| Notch1   | 5.88E-42 | 1.65342243 | 0.802 | 0.134 | 3.26E-37 | Bone marrow endothelial cells |
| Calm1    | 1.72E-41 | 1.64651688 | 0.953 | 0.735 | 9.53E-37 | Bone marrow endothelial cells |
| S100a16  | 3.08E-41 | 1.73319556 | 0.858 | 0.268 | 1.71E-36 | Bone marrow endothelial cells |
| Wwtr1    | 4.82E-41 | 1.64841529 | 0.792 | 0.238 | 2.67E-36 | Bone marrow endothelial cells |
| Tfpi     | 5.28E-41 | 2.34355585 | 0.594 | 0.039 | 2.93E-36 | Bone marrow endothelial cells |
| Ndrgr1   | 7.14E-41 | 1.55945175 | 0.849 | 0.197 | 3.96E-36 | Bone marrow endothelial cells |
| S1pr1    | 1.48E-40 | 1.77031003 | 0.877 | 0.238 | 8.18E-36 | Bone marrow endothelial cells |
| Aplp2    | 2.46E-40 | 1.71991573 | 0.925 | 0.44  | 1.36E-35 | Bone marrow endothelial cells |
| Bst2     | 2.95E-40 | 1.91001881 | 0.934 | 0.372 | 1.63E-35 | Bone marrow endothelial cells |
| Actn4    | 3.20E-40 | 1.57273572 | 0.934 | 0.472 | 1.77E-35 | Bone marrow endothelial cells |
| Nid1     | 4.01E-40 | 1.71009194 | 0.698 | 0.07  | 2.22E-35 | Bone marrow endothelial cells |
| Trp53i11 | 5.52E-40 | 1.9019952  | 0.575 | 0.027 | 3.06E-35 | Bone marrow endothelial cells |
| Adam15   | 8.49E-40 | 1.64030689 | 0.792 | 0.197 | 4.70E-35 | Bone marrow endothelial cells |
| Tcn2     | 2.30E-39 | 1.89448239 | 0.821 | 0.447 | 1.27E-34 | Bone marrow endothelial cells |
| Clic4    | 7.37E-39 | 1.83468485 | 0.858 | 0.342 | 4.09E-34 | Bone marrow endothelial cells |
| Dusp3    | 8.63E-39 | 1.70278253 | 0.651 | 0.082 | 4.78E-34 | Bone marrow endothelial cells |
| Tgfbr2   | 1.09E-38 | 1.58281464 | 0.821 | 0.243 | 6.06E-34 | Bone marrow endothelial cells |
| Heg1     | 1.97E-38 | 1.82707129 | 0.726 | 0.186 | 1.09E-33 | Bone marrow endothelial cells |
| Gimap6   | 5.59E-38 | 1.6948103  | 0.717 | 0.15  | 3.10E-33 | Bone marrow endothelial cells |
| Efnb2    | 6.35E-38 | 1.69841996 | 0.557 | 0.027 | 3.52E-33 | Bone marrow endothelial cells |
| Mafb     | 9.59E-38 | 2.82290123 | 0.755 | 0.231 | 5.31E-33 | Bone marrow endothelial cells |
| Lrg1     | 3.26E-37 | 2.38065926 | 0.821 | 0.17  | 1.80E-32 | Bone marrow endothelial cells |
| Lpar6    | 3.28E-37 | 1.66064717 | 0.66  | 0.077 | 1.82E-32 | Bone marrow endothelial cells |
| Clec2d   | 4.51E-37 | 1.89318486 | 0.849 | 0.224 | 2.50E-32 | Bone marrow endothelial cells |
| Cavin1   | 8.08E-37 | 1.71215071 | 0.83  | 0.24  | 4.48E-32 | Bone marrow endothelial cells |
| Rbp1     | 3.67E-36 | 1.82213204 | 0.651 | 0.093 | 2.03E-31 | Bone marrow endothelial cells |
| Ramp3    | 5.24E-36 | 1.75406708 | 0.472 | 0.009 | 2.90E-31 | Bone marrow endothelial cells |
| Fcgrt    | 5.30E-36 | 1.82536625 | 0.877 | 0.433 | 2.94E-31 | Bone marrow endothelial cells |
| Il6st    | 1.09E-35 | 2.54571997 | 0.783 | 0.27  | 6.05E-31 | Bone marrow endothelial cells |
| Gpr182   | 1.09E-35 | 1.64045839 | 0.434 | 0.002 | 6.05E-31 | Bone marrow endothelial cells |
| Igfbp3   | 2.38E-35 | 3.42759552 | 0.509 | 0.02  | 1.32E-30 | Bone marrow endothelial cells |
| Txnip    | 5.54E-35 | 1.62303265 | 0.953 | 0.553 | 3.07E-30 | Bone marrow endothelial cells |
| Rras     | 1.62E-34 | 1.5520348  | 0.726 | 0.172 | 8.98E-30 | Bone marrow endothelial cells |
| Id1      | 1.02E-33 | 2.21495659 | 0.802 | 0.224 | 5.66E-29 | Bone marrow endothelial cells |
| Nrp1     | 1.20E-33 | 1.50170436 | 0.792 | 0.204 | 6.66E-29 | Bone marrow endothelial cells |
| Apold1   | 8.03E-33 | 1.75658464 | 0.5   | 0.032 | 4.45E-28 | Bone marrow endothelial cells |
| Rhob     | 8.49E-32 | 1.7027247  | 0.925 | 0.515 | 4.71E-27 | Bone marrow endothelial cells |
| AW112010 | 8.84E-32 | 1.88397423 | 0.632 | 0.079 | 4.90E-27 | Bone marrow endothelial cells |
| Adamts1  | 1.24E-31 | 1.95653547 | 0.66  | 0.111 | 6.87E-27 | Bone marrow endothelial cells |
| Ctsl     | 2.21E-31 | 2.41124869 | 0.896 | 0.601 | 1.23E-26 | Bone marrow endothelial cells |
| Stab2    | 2.26E-31 | 1.938329   | 0.358 | 0     | 1.25E-26 | Bone marrow endothelial cells |
| Fbln2    | 2.66E-31 | 2.47314828 | 0.443 | 0.029 | 1.47E-26 | Bone marrow endothelial cells |
| Sema3g   | 7.29E-31 | 1.72746454 | 0.377 | 0.002 | 4.04E-26 | Bone marrow endothelial cells |

|         |          |            |       |       |          |                               |
|---------|----------|------------|-------|-------|----------|-------------------------------|
| Bmpr2   | 1.03E-30 | 1.50146626 | 0.764 | 0.286 | 5.73E-26 | Bone marrow endothelial cells |
| Aqp1    | 4.60E-30 | 2.35985177 | 0.679 | 0.243 | 2.55E-25 | Bone marrow endothelial cells |
| Itga1   | 1.15E-29 | 1.59241373 | 0.632 | 0.095 | 6.35E-25 | Bone marrow endothelial cells |
| Kcnj8   | 2.19E-29 | 1.86817299 | 0.443 | 0.02  | 1.21E-24 | Bone marrow endothelial cells |
| F8      | 3.54E-29 | 1.79194861 | 0.415 | 0.025 | 1.96E-24 | Bone marrow endothelial cells |
| Ednrb   | 5.62E-29 | 1.59244671 | 0.377 | 0.005 | 3.11E-24 | Bone marrow endothelial cells |
| Col18a1 | 7.75E-29 | 1.5422576  | 0.481 | 0.032 | 4.29E-24 | Bone marrow endothelial cells |
| Cyp4b1  | 9.23E-29 | 1.70959135 | 0.33  | 0     | 5.12E-24 | Bone marrow endothelial cells |
| Nr2f2   | 1.51E-28 | 1.50405712 | 0.5   | 0.039 | 8.36E-24 | Bone marrow endothelial cells |
| Tspan7  | 2.33E-28 | 1.80609588 | 0.491 | 0.059 | 1.29E-23 | Bone marrow endothelial cells |
| Anxa3   | 3.29E-28 | 1.52971105 | 0.698 | 0.181 | 1.82E-23 | Bone marrow endothelial cells |
| Gpm6a   | 6.68E-28 | 1.7335455  | 0.321 | 0     | 3.70E-23 | Bone marrow endothelial cells |
| Pim3    | 1.92E-26 | 1.57726905 | 0.575 | 0.127 | 1.06E-21 | Bone marrow endothelial cells |
| Depp1   | 3.62E-25 | 1.53590966 | 0.358 | 0.014 | 2.00E-20 | Bone marrow endothelial cells |
| Plk2    | 4.83E-25 | 1.72028382 | 0.651 | 0.184 | 2.67E-20 | Bone marrow endothelial cells |
| Mrc1    | 2.03E-24 | 1.77550816 | 0.434 | 0.032 | 1.13E-19 | Bone marrow endothelial cells |
| Sgk1    | 2.55E-24 | 1.86976005 | 0.651 | 0.17  | 1.41E-19 | Bone marrow endothelial cells |
| Jun     | 1.86E-23 | 1.87595295 | 0.943 | 0.569 | 1.03E-18 | Bone marrow endothelial cells |
| Klf4    | 3.82E-23 | 1.6735097  | 0.83  | 0.367 | 2.11E-18 | Bone marrow endothelial cells |
| Hspa1a  | 7.16E-23 | 2.53527313 | 0.708 | 0.229 | 3.97E-18 | Bone marrow endothelial cells |
| Glul    | 1.29E-22 | 1.56431062 | 0.689 | 0.195 | 7.14E-18 | Bone marrow endothelial cells |
| Hspa1b  | 1.59E-22 | 2.60452062 | 0.651 | 0.227 | 8.84E-18 | Bone marrow endothelial cells |
| Npnt    | 1.47E-21 | 1.56117065 | 0.481 | 0.107 | 8.13E-17 | Bone marrow endothelial cells |
| Rnase4  | 1.85E-21 | 1.51814988 | 0.528 | 0.213 | 1.02E-16 | Bone marrow endothelial cells |
| Dusp6   | 2.07E-21 | 1.50270228 | 0.679 | 0.215 | 1.15E-16 | Bone marrow endothelial cells |
| Sparcl1 | 2.84E-21 | 1.91849887 | 0.377 | 0.027 | 1.57E-16 | Bone marrow endothelial cells |
| Jund    | 3.48E-21 | 1.54035757 | 0.991 | 0.794 | 1.93E-16 | Bone marrow endothelial cells |
| Ubd     | 6.76E-21 | 1.95049048 | 0.264 | 0.002 | 3.75E-16 | Bone marrow endothelial cells |
| Rsad2   | 1.70E-19 | 1.79824548 | 0.453 | 0.063 | 9.41E-15 | Bone marrow endothelial cells |
| Fcgr2b  | 3.01E-19 | 2.04526798 | 0.368 | 0.059 | 1.67E-14 | Bone marrow endothelial cells |
| Hes1    | 5.87E-19 | 1.52785759 | 0.642 | 0.22  | 3.25E-14 | Bone marrow endothelial cells |
| 7SK.293 | 1.41E-17 | 1.77853051 | 0.651 | 0.345 | 7.82E-13 | Bone marrow endothelial cells |
| Gja4    | 1.54E-16 | 1.51862937 | 0.245 | 0.007 | 8.53E-12 | Bone marrow endothelial cells |
