# Supplementary material for: Single cell cortical bone transcriptomics define novel osteolineage gene sets altered in chronic kidney disease
Source: PubMed Central journal article supplement (PMC9910177; doi:10.3389/fendo.2023.1063083), 2023-01-26
Supplement: DataSheet_2.pdf [file DataSheet_2.pdf]

# Up 3wkvsundiff (background allpeak)

Total Target Sequences = 8562, Total Background Sequences = 84141

| Rank | Motif | Name                                                          | P-value | log P-value | q-value (Benjamini) | # Target Sequences with Motif | % of Targets Sequences with Motif | # Background Sequences with Motif | % of Background Sequences with Motif |
|------|-------|---------------------------------------------------------------|---------|-------------|---------------------|-------------------------------|-----------------------------------|-----------------------------------|--------------------------------------|
| 1    |       | RUNX1(Runt)/Jurkat-RUNX1-ChIP-Seq(GSE29180)/Homer             | 1e-94   | -2.186e+02  | 0.0000              | 4232.0                        | 49.43%                            | 32301.6                           | 38.39%                               |
| 2    |       | Foxo1(Forkhead)/RAW-Foxo1-ChIP-Seq(Fan_et_al.)/Homer          | 1e-79   | -1.826e+02  | 0.0000              | 4786.0                        | 55.90%                            | 38446.1                           | 45.69%                               |
| 3    |       | DLX1(Homeobox)/BasalGanglia-Dlx1-ChIP-seq(GSE124936)/Homer    | 1e-78   | -1.809e+02  | 0.0000              | 3300.0                        | 38.55%                            | 24445.6                           | 29.05%                               |
| 4    |       | RUNX-AML(Runt)/CD4+-PolII-ChIP-Seq(Barski_et_al.)/Homer       | 1e-75   | -1.741e+02  | 0.0000              | 3312.0                        | 38.69%                            | 24701.5                           | 29.36%                               |
| 5    |       | NeuroG2(bHLH)/Fibroblast-NeuroG2-ChIP-Seq(GSE75910)/Homer     | 1e-75   | -1.733e+02  | 0.0000              | 4181.0                        | 48.84%                            | 32826.6                           | 39.02%                               |
| 6    |       | Smad3(MAD)/NPC-Smad3-ChIP-Seq(GSE36673)/Homer                 | 1e-74   | -1.719e+02  | 0.0000              | 6206.0                        | 72.49%                            | 53116.4                           | 63.13%                               |
| 7    |       | NFAT(RHD)/Jurkat-NFATC1-ChIP-Seq(Jolma_et_al.)/Homer          | 1e-72   | -1.673e+02  | 0.0000              | 2699.0                        | 31.53%                            | 19341.8                           | 22.99%                               |
| 8    |       | TCF4(bHLH)/SHSY5Y-TCF4-ChIP-Seq(GSE96915)/Homer               | 1e-71   | -1.656e+02  | 0.0000              | 4159.0                        | 48.58%                            | 32802.7                           | 38.99%                               |
| 9    |       | Twist2(bHLH)/Myoblast-Twist2.Ty1-ChIP-Seq(GSE127998)/Homer    | 1e-68   | -1.582e+02  | 0.0000              | 4444.0                        | 51.91%                            | 35719.6                           | 42.45%                               |
| 10   |       | BHLHA15(bHLH)/NIH3T3-BHLHB8.HA-ChIP-Seq(GSE119782)/Homer      | 1e-68   | -1.574e+02  | 0.0000              | 3863.0                        | 45.12%                            | 30197.8                           | 35.89%                               |
| 11   |       | ERG(ETS)/VCaP-ERG-ChIP-Seq(GSE14097)/Homer                    | 1e-68   | -1.570e+02  | 0.0000              | 4370.0                        | 51.05%                            | 35037.7                           | 41.64%                               |
| 12   |       | RUNX2(Runt)/PCa-RUNX2-ChIP-Seq(GSE33889)/Homer                | 1e-68   | -1.568e+02  | 0.0000              | 3644.0                        | 42.57%                            | 28161.3                           | 33.47%                               |
| 13   |       | Atoh1(bHLH)/Cerebellum-Atoh1-ChIP-Seq(GSE22111)/Homer         | 1e-64   | -1.475e+02  | 0.0000              | 3226.0                        | 37.68%                            | 24520.2                           | 29.14%                               |
| 14   |       | Tcf21(bHLH)/ArterySmoothMuscle-Tcf21-ChIP-Seq(GSE61369)/Homer | 1e-63   | -1.466e+02  | 0.0000              | 2939.0                        | 34.33%                            | 21931.5                           | 26.07%                               |
| 15   |       | Mef2b(MADS)/HEK293-Mef2b.V5-ChIP-Seq(GSE67450)/Homer          | 1e-61   | -1.419e+02  | 0.0000              | 2436.0                        | 28.45%                            | 17552.8                           | 20.86%                               |
| 16   |       | Nanog(Homeobox)/mES-Nanog-ChIP-Seq(GSE11724)/Homer            | 1e-60   | -1.399e+02  | 0.0000              | 6855.0                        | 80.07%                            | 60873.4                           | 72.35%                               |

|    |  |                                                                   |       |   |           |        |        |        |         |        |
|----|--|-------------------------------------------------------------------|-------|---|-----------|--------|--------|--------|---------|--------|
| 17 |  | DLX5(Homeobox)/BasalGanglia-Dlx5-ChIP-seq(GSE124936)/Homer        | 1e-59 | - | 1.380e+02 | 0.0000 | 2096.0 | 24.48% | 14674.2 | 17.44% |
| 18 |  | CEBP(bZIP)/ThioMac-CEBPb-ChIP-Seq(GSE21512)/Homer                 | 1e-59 | - | 1.379e+02 | 0.0000 | 2375.0 | 27.74% | 17103.1 | 20.33% |
| 19 |  | NF1-halbsite(CTF)/LNCaP-NF1-ChIP-Seq(Unpublished)/Homer           | 1e-59 | - | 1.374e+02 | 0.0000 | 4755.0 | 55.54% | 39299.3 | 46.71% |
| 20 |  | DLX2(Homeobox)/BasalGanglia-Dlx2-ChIP-seq(GSE124936)/Homer        | 1e-58 | - | 1.357e+02 | 0.0000 | 3502.0 | 40.91% | 27360.9 | 32.52% |
| 21 |  | Olig2(bHLH)/Neuron-Olig2-ChIP-Seq(GSE30882)/Homer                 | 1e-58 | - | 1.349e+02 | 0.0000 | 4702.0 | 54.92% | 38850.5 | 46.17% |
| 22 |  | Pitx1:Ebox(Homeobox,bHLH)/Hindlimb-Pitx1-ChIP-Seq(GSE41591)/Homer | 1e-58 | - | 1.337e+02 | 0.0000 | 808.0  | 9.44%  | 4339.8  | 5.16%  |
| 23 |  | Smad2(MAD)/ES-SMAD2-ChIP-Seq(GSE29422)/Homer                      | 1e-57 | - | 1.331e+02 | 0.0000 | 4151.0 | 48.49% | 33560.0 | 39.89% |
| 24 |  | HLF(bZIP)/HSC-HLF.Flag-ChIP-Seq(GSE69817)/Homer                   | 1e-57 | - | 1.330e+02 | 0.0000 | 2502.0 | 29.23% | 18330.7 | 21.79% |
| 25 |  | Pitx1(Homeobox)/Chicken-Pitx1-ChIP-Seq(GSE38910)/Homer            | 1e-57 | - | 1.321e+02 | 0.0000 | 6876.0 | 80.32% | 61304.9 | 72.86% |
| 26 |  | Smad4(MAD)/ESC-SMAD4-ChIP-Seq(GSE29422)/Homer                     | 1e-55 | - | 1.286e+02 | 0.0000 | 4184.0 | 48.87% | 34002.7 | 40.41% |
| 27 |  | ETV1(ETS)/GIST48-ETV1-ChIP-Seq(GSE22441)/Homer                    | 1e-54 | - | 1.250e+02 | 0.0000 | 3825.0 | 44.68% | 30679.3 | 36.46% |
| 28 |  | Dlx3(Homeobox)/Kerainocytes-Dlx3-ChIP-Seq(GSE89884)/Homer         | 1e-53 | - | 1.241e+02 | 0.0000 | 1806.0 | 21.10% | 12471.0 | 14.82% |
| 29 |  | Sox3(HMG)/NPC-Sox3-ChIP-Seq(GSE33059)/Homer                       | 1e-53 | - | 1.241e+02 | 0.0000 | 4262.0 | 49.78% | 34879.1 | 41.45% |
| 30 |  | Nkx6.1(Homeobox)/Islet-Nkx6.1-ChIP-Seq(GSE40975)/Homer            | 1e-53 | - | 1.239e+02 | 0.0000 | 4957.0 | 57.90% | 41675.0 | 49.53% |
| 31 |  | Sox21(HMG)/ESC-SOX21-ChIP-Seq(GSE110505)/Homer                    | 1e-53 | - | 1.230e+02 | 0.0000 | 4437.0 | 51.83% | 36603.1 | 43.50% |
| 32 |  | Six2(Homeobox)/NephronProgenitor-Six2-ChIP-Seq(GSE39837)/Homer    | 1e-53 | - | 1.226e+02 | 0.0000 | 2972.0 | 34.72% | 22809.7 | 27.11% |
| 33 |  | Ap4(bHLH)/AML-Tfap4-ChIP-Seq(GSE45738)/Homer                      | 1e-53 | - | 1.226e+02 | 0.0000 | 3466.0 | 40.49% | 27370.6 | 32.53% |
| 34 |  | Fli1(ETS)/CD8-FLI-ChIP-Seq(GSE20898)/Homer                        | 1e-52 | - | 1.219e+02 | 0.0000 | 3291.0 | 38.44% | 25760.0 | 30.62% |
| 35 |  | EWS:ERG-fusion(ETS)/CADO_ES1-EWS:ERG-ChIP-Seq(SRA014231)/Homer    | 1e-50 | - | 1.168e+02 | 0.0000 | 2395.0 | 27.98% | 17753.1 | 21.10% |

|    |                                                                                     |                                                         |       |   |           |        |        |        |         |        |
|----|-------------------------------------------------------------------------------------|---------------------------------------------------------|-------|---|-----------|--------|--------|--------|---------|--------|
| 36 |     | SCL(bHLH)/HPC7-Scl-ChIP-Seq(GSE13511)/Homer             | 1e-50 | - | 1.163e+02 | 0.0000 | 7294.0 | 85.20% | 66336.0 | 78.84% |
| 37 |    | RUNX(Runt)/HPC7-Runx1-ChIP-Seq(GSE22178)/Homer          | 1e-50 | - | 1.158e+02 | 0.0000 | 3240.0 | 37.85% | 25451.4 | 30.25% |
| 38 |    | AR-halfsite(NR)/LNCaP-AR-ChIP-Seq(GSE27824)/Homer       | 1e-50 | - | 1.156e+02 | 0.0000 | 6836.0 | 79.85% | 61312.9 | 72.87% |
| 39 |    | Sox6(HMG)/Myotubes-Sox6-ChIP-Seq(GSE32627)/Homer        | 1e-50 | - | 1.155e+02 | 0.0000 | 3962.0 | 46.28% | 32249.8 | 38.33% |
| 40 |    | En1(Homeobox)/SUM149-EN1-ChIP-Seq(GSE120957)/Homer      | 1e-49 | - | 1.134e+02 | 0.0000 | 4019.0 | 46.95% | 32855.5 | 39.05% |
| 41 |    | Etv2(ETS)/ES-ER71-ChIP-Seq(GSE59402)/Homer              | 1e-47 | - | 1.084e+02 | 0.0000 | 2949.0 | 34.45% | 22971.2 | 27.30% |
| 42 |    | CEBP:AP1(bZIP)/ThioMac-CEBPb-ChIP-Seq(GSE21512)/Homer   | 1e-47 | - | 1.083e+02 | 0.0000 | 2324.0 | 27.15% | 17327.1 | 20.59% |
| 43 |    | Lhx3(Homeobox)/Neuron-Lhx3-ChIP-Seq(GSE31456)/Homer     | 1e-46 | - | 1.075e+02 | 0.0000 | 3616.0 | 42.24% | 29203.8 | 34.71% |
| 44 |    | NFIL3(bZIP)/HepG2-NFIL3-ChIP-Seq(Encode)/Homer          | 1e-46 | - | 1.072e+02 | 0.0000 | 2016.0 | 23.55% | 14639.2 | 17.40% |
| 45 |    | IRF1(IRF)/PBMC-IRF1-ChIP-Seq(GSE43036)/Homer            | 1e-46 | - | 1.071e+02 | 0.0000 | 709.0  | 8.28%  | 3920.1  | 4.66%  |
| 46 |    | ISRE(IRF)/ThioMac-LPS-Expression(GSE23622)/Homer        | 1e-46 | - | 1.068e+02 | 0.0000 | 408.0  | 4.77%  | 1812.1  | 2.15%  |
| 47 |    | PU.1-IRF(ETS:IRF)/Bcell-PU.1-ChIP-Seq(GSE21512)/Homer   | 1e-46 | - | 1.067e+02 | 0.0000 | 3597.0 | 42.02% | 29046.2 | 34.52% |
| 48 |  | ETV4(ETS)/HepG2-ETV4-ChIP-Seq(ENCODE)/Homer             | 1e-46 | - | 1.063e+02 | 0.0000 | 3197.0 | 37.34% | 25318.1 | 30.09% |
| 49 |  | LHX9(Homeobox)/Hct116-LHX9.V5-ChIP-Seq(GSE116822)/Homer | 1e-45 | - | 1.056e+02 | 0.0000 | 3264.0 | 38.13% | 25959.7 | 30.85% |
| 50 |  | LEF1(HMG)/H1-LEF1-ChIP-Seq(GSE64758)/Homer              | 1e-45 | - | 1.053e+02 | 0.0000 | 1989.0 | 23.23% | 14448.5 | 17.17% |
| 51 |  | Sox15(HMG)/CPA-Sox15-ChIP-Seq(GSE62909)/Homer           | 1e-45 | - | 1.052e+02 | 0.0000 | 2928.0 | 34.20% | 22867.6 | 27.18% |
| 52 |  | ETS1(ETS)/Jurkat-ETS1-ChIP-Seq(GSE17954)/Homer          | 1e-45 | - | 1.049e+02 | 0.0000 | 3151.0 | 36.81% | 24931.2 | 29.63% |
| 53 |  | Rbpj1(?)/Panc1-Rbpj1-ChIP-Seq(GSE47459)/Homer           | 1e-45 | - | 1.045e+02 | 0.0000 | 3888.0 | 45.42% | 31871.5 | 37.88% |

|    |  |                                                              |       |   |           |        |        |        |         |        |
|----|--|--------------------------------------------------------------|-------|---|-----------|--------|--------|--------|---------|--------|
| 54 |  | EHF(ETS)/LoVo-EHF-ChIP-Seq(GSE49402)/Homer                   | 1e-44 | - | 1.023e+02 | 0.0000 | 3538.0 | 41.33% | 28622.6 | 34.02% |
| 55 |  | Lhx1(Homeobox)/EmbryoCarcinoma-Lhx1-ChIP-Seq(GSE70957)/Homer | 1e-44 | - | 1.018e+02 | 0.0000 | 2581.0 | 30.15% | 19797.3 | 23.53% |
| 56 |  | Lhx2(Homeobox)/HFSC-Lhx2-ChIP-Seq(GSE48068)/Homer            | 1e-44 | - | 1.015e+02 | 0.0000 | 2545.0 | 29.73% | 19480.5 | 23.15% |
| 57 |  | IRF8(IRF)/BMDM-IRF8-ChIP-Seq(GSE77884)/Homer                 | 1e-43 | - | 1.009e+02 | 0.0000 | 1234.0 | 14.41% | 8132.1  | 9.67%  |
| 58 |  | Sox10(HMG)/SciaticNerve-Sox3-ChIP-Seq(GSE35132)/Homer        | 1e-43 | - | 1.007e+02 | 0.0000 | 4077.0 | 47.62% | 33799.6 | 40.17% |
| 59 |  | IRF2(IRF)/Erythroblasts-IRF2-ChIP-Seq(GSE36985)/Homer        | 1e-43 | - | 9.948e+01 | 0.0000 | 590.0  | 6.89%  | 3137.6  | 3.73%  |
| 60 |  | MyoD(bHLH)/Myotube-MyoD-ChIP-Seq(GSE21614)/Homer             | 1e-42 | - | 9.857e+01 | 0.0000 | 2370.0 | 27.68% | 17983.9 | 21.37% |
| 61 |  | IRF3(IRF)/BMDM-Irf3-ChIP-Seq(GSE67343)/Homer                 | 1e-41 | - | 9.635e+01 | 0.0000 | 1299.0 | 15.17% | 8754.0  | 10.40% |
| 62 |  | Nkx3.1(Homeobox)/LNCaP-Nkx3.1-ChIP-Seq(GSE28264)/Homer       | 1e-39 | - | 9.207e+01 | 0.0000 | 5035.0 | 58.81% | 43451.3 | 51.64% |
| 63 |  | ZNF416(Zf)/HEK293-ZNF416.GFP-ChIP-Seq(GSE58341)/Homer        | 1e-39 | - | 9.198e+01 | 0.0000 | 3662.0 | 42.78% | 30115.4 | 35.79% |
| 64 |  | CRX(Homeobox)/Retina-Crx-ChIP-Seq(GSE20012)/Homer            | 1e-39 | - | 9.150e+01 | 0.0000 | 4793.0 | 55.99% | 41074.7 | 48.82% |
| 65 |  | THRb(NR)/Liver-NR1A2-ChIP-Seq(GSE52613)/Homer                | 1e-39 | - | 9.115e+01 | 0.0000 | 6763.0 | 79.00% | 61245.7 | 72.79% |
| 66 |  | ZBTB18(Zf)/HEK293-ZBTB18.GFP-ChIP-Seq(GSE58341)/Homer        | 1e-39 | - | 9.049e+01 | 0.0000 | 1697.0 | 19.82% | 12253.4 | 14.56% |
| 67 |  | Tcf7(HMG)/GM12878-TCF7-ChIP-Seq(Encode)/Homer                | 1e-38 | - | 8.872e+01 | 0.0000 | 1141.0 | 13.33% | 7593.0  | 9.02%  |
| 68 |  | GABPA(ETS)/Jurkat-GABPa-ChIP-Seq(GSE17954)/Homer             | 1e-38 | - | 8.821e+01 | 0.0000 | 2764.0 | 32.29% | 21847.5 | 25.97% |
| 69 |  | MyoG(bHLH)/C2C12-MyoG-ChIP-Seq(GSE36024)/Homer               | 1e-37 | - | 8.707e+01 | 0.0000 | 2830.0 | 33.06% | 22488.6 | 26.73% |
| 70 |  | TEAD3(TEA)/HepG2-TEAD3-ChIP-Seq(Encode)/Homer                | 1e-37 | - | 8.566e+01 | 0.0000 | 3469.0 | 40.52% | 28494.7 | 33.87% |
| 71 |  | Fox:Ebox(Forkhead,bHLH)/Panc1-Foxa2-ChIP-Seq(GSE47459)/Homer | 1e-37 | - | 8.556e+01 | 0.0000 | 3006.0 | 35.11% | 24163.0 | 28.72% |
| 72 |  | Ptf1a(bHLH)/Panc1-Ptf1a-ChIP-Seq(GSE47459)/Homer             | 1e-36 | - | 8.400e+01 | 0.0000 | 5058.0 | 59.08% | 43961.7 | 52.25% |

|    |  |                                                                        |       |            |        |        |        |         |        |
|----|--|------------------------------------------------------------------------|-------|------------|--------|--------|--------|---------|--------|
| 73 |  | FoxD3(forkhead)/ZebrafishEmbryo-Foxd3.biotin-ChIP-Seq(GSE106676)/Homer | 1e-36 | -8.396e+01 | 0.0000 | 2787.0 | 32.55% | 22187.4 | 26.37% |
| 74 |  | Ascl1(bHLH)/NeuralTubes-Ascl1-ChIP-Seq(GSE55840)/Homer                 | 1e-36 | -8.369e+01 | 0.0000 | 3655.0 | 42.69% | 30322.5 | 36.04% |
| 75 |  | Sox2(HMG)/mES-Sox2-ChIP-Seq(GSE11431)/Homer                            | 1e-36 | -8.363e+01 | 0.0000 | 2479.0 | 28.96% | 19379.7 | 23.03% |
| 76 |  | Ets1-distal(ETS)/CD4+-PolII-ChIP-Seq(Barski_et_al.)/Homer              | 1e-36 | -8.347e+01 | 0.0000 | 1236.0 | 14.44% | 8482.3  | 10.08% |
| 77 |  | RARa(NR)/K562-RARa-ChIP-Seq(Encode)/Homer                              | 1e-36 | -8.331e+01 | 0.0000 | 5622.0 | 65.67% | 49652.2 | 59.01% |
| 78 |  | KLF14(Zf)/HEK293-KLF14.GFP-ChIP-Seq(GSE58341)/Homer                    | 1e-36 | -8.320e+01 | 0.0000 | 3922.0 | 45.81% | 32889.7 | 39.09% |
| 79 |  | Tcf12(bHLH)/GM12878-Tcf12-ChIP-Seq(GSE32465)/Homer                     | 1e-36 | -8.290e+01 | 0.0000 | 2730.0 | 31.89% | 21695.7 | 25.79% |
| 80 |  | FOXK1(Forkhead)/HEK293-FOXK1-ChIP-Seq(GSE51673)/Homer                  | 1e-35 | -8.275e+01 | 0.0000 | 2823.0 | 32.98% | 22556.0 | 26.81% |
| 81 |  | PR(NR)/T47D-PR-ChIP-Seq(GSE31130)/Homer                                | 1e-35 | -8.141e+01 | 0.0000 | 5030.0 | 58.75% | 43776.7 | 52.03% |
| 82 |  | Mef2a(MADS)/HL1-Mef2a.biotin-ChIP-Seq(GSE21529)/Homer                  | 1e-35 | -8.139e+01 | 0.0000 | 1316.0 | 15.37% | 9198.3  | 10.93% |
| 83 |  | MYB(HTH)/ERMYB-Myb-ChIPSeq(GSE22095)/Homer                             | 1e-35 | -8.114e+01 | 0.0000 | 4139.0 | 48.35% | 35051.5 | 41.66% |
| 84 |  | HIC1(Zf)/Treg-ZBTB29-ChIP-Seq(GSE99889)/Homer                          | 1e-35 | -8.075e+01 | 0.0000 | 4780.0 | 55.83% | 41324.8 | 49.12% |
| 85 |  | Nkx2.1(Homeobox)/LungAC-Nkx2.1-ChIP-Seq(GSE43252)/Homer                | 1e-35 | -8.071e+01 | 0.0000 | 5765.0 | 67.34% | 51199.5 | 60.85% |
| 86 |  | FOXA1(Forkhead)/LNCAP-FOXA1-ChIP-Seq(GSE27824)/Homer                   | 1e-35 | -8.060e+01 | 0.0000 | 3289.0 | 38.42% | 26966.2 | 32.05% |
| 87 |  | Sox4(HMG)/proB-Sox4-ChIP-Seq(GSE50066)/Homer                           | 1e-34 | -7.982e+01 | 0.0000 | 2450.0 | 28.62% | 19228.3 | 22.85% |
| 88 |  | Mef2c(MADS)/GM12878-Mef2c-ChIP-Seq(GSE32465)/Homer                     | 1e-34 | -7.959e+01 | 0.0000 | 1406.0 | 16.42% | 10002.6 | 11.89% |
| 89 |  | Myf5(bHLH)/GM-Myf5-ChIP-Seq(GSE24852)/Homer                            | 1e-34 | -7.953e+01 | 0.0000 | 2086.0 | 24.37% | 15954.5 | 18.96% |
| 90 |  | STAT4(Stat)/CD4-Stat4-ChIP-Seq(GSE22104)/Homer                         | 1e-33 | -7.763e+01 | 0.0000 | 2785.0 | 32.53% | 22367.0 | 26.58% |

|     |  |                                                                 |       |            |        |        |        |         |        |
|-----|--|-----------------------------------------------------------------|-------|------------|--------|--------|--------|---------|--------|
| 91  |  | IRF4(IRF)/GM12878-IRF4-ChIP-Seq(GSE32465)/Homer                 | 1e-32 | -7.427e+01 | 0.0000 | 1427.0 | 16.67% | 10305.8 | 12.25% |
| 92  |  | FOXM1(Forkhead)/MCF7-FOXM1-ChIP-Seq(GSE72977)/Homer             | 1e-32 | -7.420e+01 | 0.0000 | 2951.0 | 34.47% | 24019.6 | 28.55% |
| 93  |  | Znf263(Zf)/K562-Znf263-ChIP-Seq(GSE31477)/Homer                 | 1e-32 | -7.385e+01 | 0.0000 | 4056.0 | 47.38% | 34514.4 | 41.02% |
| 94  |  | Tgif1(Homeobox)/mES-Tgif1-ChIP-Seq(GSE55404)/Homer              | 1e-32 | -7.371e+01 | 0.0000 | 5823.0 | 68.02% | 52047.3 | 61.86% |
| 95  |  | Bapx1(Homeobox)/VertebralCol-Bapx1-ChIP-Seq(GSE36672)/Homer     | 1e-31 | -7.365e+01 | 0.0000 | 4707.0 | 54.98% | 40869.1 | 48.57% |
| 96  |  | TEAD1(TEAD)/HepG2-TEAD1-ChIP-Seq(Encode)/Homer                  | 1e-31 | -7.360e+01 | 0.0000 | 3107.0 | 36.29% | 25496.3 | 30.30% |
| 97  |  | EWS:FLI1-fusion(ETS)/SK_N_MC-EWS:FLI1-ChIP-Seq(SRA014231)/Homer | 1e-31 | -7.333e+01 | 0.0000 | 1947.0 | 22.74% | 14887.7 | 17.69% |
| 98  |  | Elf4(ETS)/BMDM-Elf4-ChIP-Seq(GSE88699)/Homer                    | 1e-31 | -7.205e+01 | 0.0000 | 2916.0 | 34.06% | 23766.4 | 28.25% |
| 99  |  | FOXA1(Forkhead)/MCF7-FOXA1-ChIP-Seq(GSE26831)/Homer             | 1e-31 | -7.146e+01 | 0.0000 | 2842.0 | 33.20% | 23098.2 | 27.45% |
| 100 |  | ELF3(ETS)/PDAC-ELF3-ChIP-Seq(GSE64557)/Homer                    | 1e-30 | -7.113e+01 | 0.0000 | 2255.0 | 26.34% | 17721.9 | 21.06% |
| 101 |  | NeuroD1(bHLH)/Islet-NeuroD1-ChIP-Seq(GSE30298)/Homer            | 1e-30 | -7.108e+01 | 0.0000 | 2428.0 | 28.36% | 19297.7 | 22.94% |
| 102 |  | HEB(bHLH)/mES-Heb-ChIP-Seq(GSE53233)/Homer                      | 1e-30 | -7.017e+01 | 0.0000 | 3857.0 | 45.05% | 32736.5 | 38.91% |
| 103 |  | Foxf1(Forkhead)/Lung-Foxf1-ChIP-Seq(GSE77951)/Homer             | 1e-29 | -6.889e+01 | 0.0000 | 2528.0 | 29.53% | 20284.7 | 24.11% |
| 104 |  | Foxo3(Forkhead)/U2OS-Foxo3-ChIP-Seq(E-MTAB-2701)/Homer          | 1e-29 | -6.864e+01 | 0.0000 | 2191.0 | 25.59% | 17218.3 | 20.46% |
| 105 |  | PRDM1(Zf)/Hela-PRDM1-ChIP-Seq(GSE31477)/Homer                   | 1e-29 | -6.849e+01 | 0.0000 | 1671.0 | 19.52% | 12576.3 | 14.95% |
| 106 |  | TEAD4(TEA)/Tropoblast-Tead4-ChIP-Seq(GSE37350)/Homer            | 1e-29 | -6.810e+01 | 0.0000 | 2789.0 | 32.58% | 22721.2 | 27.00% |
| 107 |  | BMAL1(bHLH)/Liver-Bmal1-ChIP-Seq(GSE39860)/Homer                | 1e-29 | -6.749e+01 | 0.0000 | 3939.0 | 46.01% | 33627.8 | 39.97% |
| 108 |  | Foxh1(Forkhead)/hESC-FOXH1-ChIP-Seq(GSE29422)/Homer             | 1e-29 | -6.727e+01 | 0.0000 | 1720.0 | 20.09% | 13042.3 | 15.50% |
| 109 |  | Rfx6(HTH)/Min6b1-Rfx6.HA-ChIP-Seq(GSE62844)/Homer               | 1e-29 | -6.719e+01 | 0.0000 | 2964.0 | 34.62% | 24383.9 | 28.98% |

|     |  |                                                                  |       |            |        |        |        |         |        |
|-----|--|------------------------------------------------------------------|-------|------------|--------|--------|--------|---------|--------|
| 110 |  | Nkx2.2(Homeobox)/NPC-Nkx2.2-ChIP-Seq(GSE61673)/Homer             | 1e-28 | -6.660e+01 | 0.0000 | 4424.0 | 51.68% | 38368.5 | 45.60% |
| 111 |  | NFkB-p65(RHD)/GM12787-p65-ChIP-Seq(GSE19485)/Homer               | 1e-28 | -6.632e+01 | 0.0000 | 1551.0 | 18.12% | 11581.6 | 13.77% |
| 112 |  | PU.1(ETS)/ThioMac-PU.1-ChIP-Seq(GSE21512)/Homer                  | 1e-28 | -6.494e+01 | 0.0000 | 1654.0 | 19.32% | 12524.3 | 14.89% |
| 113 |  | Sox17(HMG)/Endoderm-Sox17-ChIP-Seq(GSE61475)/Homer               | 1e-28 | -6.452e+01 | 0.0000 | 1995.0 | 23.30% | 15576.2 | 18.51% |
| 114 |  | Foxa2(Forkhead)/Liver-Foxa2-ChIP-Seq(GSE25694)/Homer             | 1e-28 | -6.449e+01 | 0.0000 | 2248.0 | 26.26% | 17867.0 | 21.24% |
| 115 |  | Hoxa9(Homeobox)/ChickenMSG-Hoxa9.Flag-ChIP-Seq(GSE86088)/Homer   | 1e-27 | -6.389e+01 | 0.0000 | 5209.0 | 60.85% | 46235.1 | 54.95% |
| 116 |  | Nkx2.5(Homeobox)/HL1-Nkx2.5.biotin-ChIP-Seq(GSE21529)/Homer      | 1e-27 | -6.374e+01 | 0.0000 | 4832.0 | 56.44% | 42494.5 | 50.51% |
| 117 |  | EAR2(NR)/K562-NR2F6-ChIP-Seq(Encode)/Homer                       | 1e-27 | -6.360e+01 | 0.0000 | 3231.0 | 37.74% | 27023.1 | 32.12% |
| 118 |  | Eomes(T-box)/H9-Eomes-ChIP-Seq(GSE26097)/Homer                   | 1e-27 | -6.282e+01 | 0.0000 | 4190.0 | 48.94% | 36241.3 | 43.07% |
| 119 |  | Isl1(Homeobox)/Neuron-Isl1-ChIP-Seq(GSE31456)/Homer              | 1e-26 | -6.204e+01 | 0.0000 | 4119.0 | 48.11% | 35584.2 | 42.29% |
| 120 |  | BMYB(HTH)/Hela-BMYB-ChIP-Seq(GSE27030)/Homer                     | 1e-26 | -6.186e+01 | 0.0000 | 3716.0 | 43.41% | 31706.8 | 37.68% |
| 121 |  | GSC(Homeobox)/FrogEmbryos-GSC-ChIP-Seq(DRA000576)/Homer          | 1e-26 | -6.170e+01 | 0.0000 | 2709.0 | 31.64% | 22204.6 | 26.39% |
| 122 |  | Hoxa11(Homeobox)/ChickenMSG-Hoxa11.Flag-ChIP-Seq(GSE86088)/Homer | 1e-26 | -6.158e+01 | 0.0000 | 4739.0 | 55.36% | 41665.6 | 49.52% |
| 123 |  | Zac1(Zf)/Neuro2A-Plagl1-ChIP-Seq(GSE75942)/Homer                 | 1e-26 | -6.145e+01 | 0.0000 | 5108.0 | 59.67% | 45328.7 | 53.87% |
| 124 |  | AMYB(HTH)/Testes-AMYB-ChIP-Seq(GSE44588)/Homer                   | 1e-26 | -6.124e+01 | 0.0000 | 3798.0 | 44.36% | 32518.8 | 38.65% |
| 125 |  | Sp2(Zf)/HEK293-Sp2.eGFP-ChIP-Seq(Encode)/Homer                   | 1e-26 | -6.112e+01 | 0.0000 | 3536.0 | 41.30% | 30014.1 | 35.67% |
| 126 |  | Hoxd11(Homeobox)/ChickenMSG-Hoxd11.Flag-ChIP-Seq(GSE86088)/Homer | 1e-26 | -6.088e+01 | 0.0000 | 4841.0 | 56.55% | 42702.2 | 50.75% |
| 127 |  | SPDEF(ETS)/VCaP-SPDEF-ChIP-Seq(SRA014231)/Homer                  | 1e-26 | -6.069e+01 | 0.0000 | 2896.0 | 33.83% | 23984.5 | 28.51% |
| 128 |  | bZIP:IRF(bZIP,IRF)/Th17-BatF-ChIP-Seq(GSE39756)/Homer            | 1e-26 | -6.013e+01 | 0.0000 | 1415.0 | 16.53% | 10558.8 | 12.55% |

|     |  |                                                                  |       |            |        |        |        |         |        |
|-----|--|------------------------------------------------------------------|-------|------------|--------|--------|--------|---------|--------|
| 129 |  | PU.1:IRF8(ETS:IRF)/pDC-Irf8-ChIP-Seq(GSE66899)/Homer             | 1e-26 | -5.996e+01 | 0.0000 | 736.0  | 8.60%  | 4823.6  | 5.73%  |
| 130 |  | MITF(bHLH)/MastCells-MITF-ChIP-Seq(GSE48085)/Homer               | 1e-25 | -5.863e+01 | 0.0000 | 2589.0 | 30.24% | 21202.6 | 25.20% |
| 131 |  | Meis1(Homeobox)/MastCells-Meis1-ChIP-Seq(GSE48085)/Homer         | 1e-25 | -5.797e+01 | 0.0000 | 3939.0 | 46.01% | 34011.5 | 40.42% |
| 132 |  | NPAS(bHLH)/Liver-NPAS-ChIP-Seq(GSE39860)/Homer                   | 1e-25 | -5.775e+01 | 0.0000 | 3593.0 | 41.97% | 30695.1 | 36.48% |
| 133 |  | FOXK2(Forkhead)/U2OS-FOXK2-ChIP-Seq(E-MTAB-2204)/Homer           | 1e-24 | -5.753e+01 | 0.0000 | 1871.0 | 21.85% | 14679.6 | 17.45% |
| 134 |  | Tcf3(HMG)/mES-Tcf3-ChIP-Seq(GSE11724)/Homer                      | 1e-24 | -5.688e+01 | 0.0000 | 836.0  | 9.77%  | 5701.5  | 6.78%  |
| 135 |  | Hoxd12(Homeobox)/ChickenMSG-Hoxd12.Flag-ChIP-Seq(GSE86088)/Homer | 1e-24 | -5.669e+01 | 0.0000 | 3874.0 | 45.25% | 33438.1 | 39.74% |
| 136 |  | ELF5(ETS)/T47D-ELF5-ChIP-Seq(GSE30407)/Homer                     | 1e-24 | -5.549e+01 | 0.0000 | 2173.0 | 25.38% | 17486.4 | 20.78% |
| 137 |  | Tgif2(Homeobox)/mES-Tgif2-ChIP-Seq(GSE55404)/Homer               | 1e-24 | -5.544e+01 | 0.0000 | 6085.0 | 71.08% | 55454.0 | 65.91% |
| 138 |  | ZNF711(Zf)/SHSY5Y-ZNF711-ChIP-Seq(GSE20673)/Homer                | 1e-23 | -5.485e+01 | 0.0000 | 3759.0 | 43.91% | 32409.6 | 38.52% |
| 139 |  | FOXP1(Forkhead)/H9-FOXP1-ChIP-Seq(GSE31006)/Homer                | 1e-23 | -5.473e+01 | 0.0000 | 1381.0 | 16.13% | 10409.8 | 12.37% |
| 140 |  | Hoxa13(Homeobox)/ChickenMSG-Hoxa13.Flag-ChIP-Seq(GSE86088)/Homer | 1e-23 | -5.462e+01 | 0.0000 | 4915.0 | 57.41% | 43705.0 | 51.94% |
| 141 |  | FoxL2(Forkhead)/Ovary-FoxL2-ChIP-Seq(GSE60858)/Homer             | 1e-23 | -5.445e+01 | 0.0000 | 2356.0 | 27.52% | 19202.0 | 22.82% |
| 142 |  | Bcl6(Zf)/Liver-Bcl6-ChIP-Seq(GSE31578)/Homer                     | 1e-23 | -5.370e+01 | 0.0000 | 3598.0 | 42.03% | 30913.3 | 36.74% |
| 143 |  | RXR(NR),DR1/3T3L1-RXR-ChIP-Seq(GSE13511)/Homer                   | 1e-23 | -5.358e+01 | 0.0000 | 2868.0 | 33.50% | 23996.2 | 28.52% |
| 144 |  | Mef2d(MADS)/Retina-Mef2d-ChIP-Seq(GSE61391)/Homer                | 1e-23 | -5.323e+01 | 0.0000 | 716.0  | 8.36%  | 4788.6  | 5.69%  |
| 145 |  | Atf1(bZIP)/K562-ATF1-ChIP-Seq(GSE31477)/Homer                    | 1e-22 | -5.216e+01 | 0.0000 | 1782.0 | 20.82% | 14052.3 | 16.70% |
| 146 |  | Sox9(HMG)/Limb-SOX9-ChIP-Seq(GSE73225)/Homer                     | 1e-21 | -5.007e+01 | 0.0000 | 2472.0 | 28.88% | 20440.4 | 24.29% |



|     |  |                                                       |       |   |           |        |        |        |         |        |
|-----|--|-------------------------------------------------------|-------|---|-----------|--------|--------|--------|---------|--------|
| 147 |  | THRα(NR)/C17.2-THRα-ChIP-Seq(GSE38347)/Homer          | 1e-21 | - | 4.932e+01 | 0.0000 | 1236.0 | 14.44% | 9293.8  | 11.05% |
| 148 |  | TEAD2(TEA)/Py2T-Tead2-ChIP-Seq(GSE55709)/Homer        | 1e-21 | - | 4.857e+01 | 0.0000 | 1878.0 | 21.94% | 15042.2 | 17.88% |
| 149 |  | TEAD(TEA)/Fibroblast-PU.1-ChIP-Seq(Unpublished)/Homer | 1e-20 | - | 4.792e+01 | 0.0000 | 2281.0 | 26.64% | 18756.2 | 22.29% |
| 150 |  | Tbr1(T-box)/Cortex-Tbr1-ChIP-Seq(GSE71384)/Homer      | 1e-20 | - | 4.784e+01 | 0.0000 | 3047.0 | 35.59% | 25921.0 | 30.81% |
| 151 |  | Erra(NR)/HepG2-Erra-ChIP-Seq(GSE31477)/Homer          | 1e-20 | - | 4.648e+01 | 0.0000 | 4795.0 | 56.01% | 42896.0 | 50.98% |
| 152 |  | PPARα(NR),DR1/Liver-Ppara-ChIP-Seq(GSE47954)/Homer    | 1e-20 | - | 4.647e+01 | 0.0000 | 2717.0 | 31.74% | 22872.8 | 27.18% |
| 153 |  | Gfi1b(Zf)/HPC7-Gfi1b-ChIP-Seq(GSE22178)/Homer         | 1e-19 | - | 4.533e+01 | 0.0000 | 1873.0 | 21.88% | 15113.6 | 17.96% |
| 154 |  | Stat3+il21(Stat)/CD4-Stat3-ChIP-Seq(GSE19198)/Homer   | 1e-19 | - | 4.525e+01 | 0.0000 | 2135.0 | 24.94% | 17514.8 | 20.82% |
| 155 |  | COUP-TFII(NR)/K562-NR2F1-ChIP-Seq(Encode)/Homer       | 1e-19 | - | 4.500e+01 | 0.0000 | 3422.0 | 39.97% | 29616.9 | 35.20% |
| 156 |  | E2A(bHLH)/proBcell-E2A-ChIP-Seq(GSE21978)/Homer       | 1e-19 | - | 4.484e+01 | 0.0000 | 2946.0 | 34.41% | 25098.8 | 29.83% |
| 157 |  | STAT6(Stat)/CD4-Stat6-ChIP-Seq(GSE22104)/Homer        | 1e-19 | - | 4.400e+01 | 0.0000 | 1588.0 | 18.55% | 12581.5 | 14.95% |
| 158 |  | PPARE(NR),DR1/3T3L1-Pparg-ChIP-Seq(GSE13511)/Homer    | 1e-19 | - | 4.399e+01 | 0.0000 | 2480.0 | 28.97% | 20761.2 | 24.68% |
| 159 |  | KLF6(Zf)/PDAC-KLF6-ChIP-Seq(GSE64557)/Homer           | 1e-18 | - | 4.294e+01 | 0.0000 | 2770.0 | 32.36% | 23523.1 | 27.96% |
| 160 |  | Atf4(bZIP)/MEF-Atf4-ChIP-Seq(GSE35681)/Homer          | 1e-18 | - | 4.228e+01 | 0.0000 | 909.0  | 10.62% | 6654.3  | 7.91%  |
| 161 |  | PRDM15(Zf)/ESC-Prdm15-ChIP-Seq(GSE73694)/Homer        | 1e-17 | - | 4.141e+01 | 0.0000 | 2675.0 | 31.25% | 22698.0 | 26.98% |
| 162 |  | ERE(NR),IR3/MCF7-ERα-ChIP-Seq(Unpublished)/Homer      | 1e-17 | - | 4.123e+01 | 0.0000 | 873.0  | 10.20% | 6373.7  | 7.58%  |
| 163 |  | CHR(?)/Hela-CellCycle-Expression/Homer                | 1e-17 | - | 4.002e+01 | 0.0000 | 1680.0 | 19.62% | 13555.3 | 16.11% |
| 164 |  | STAT6(Stat)/Macrophage-Stat6-ChIP-Seq(GSE38377)/Homer | 1e-17 | - | 3.988e+01 | 0.0000 | 1630.0 | 19.04% | 13107.2 | 15.58% |
| 165 |  | Otx2(Homeobox)/EpiLC-Otx2-ChIP-Seq(GSE56098)/Homer    | 1e-17 | - | 3.952e+01 | 0.0000 | 1921.0 | 22.44% | 15774.5 | 18.75% |

|     |  |                                                                  |       |   |           |        |        |        |         |        |
|-----|--|------------------------------------------------------------------|-------|---|-----------|--------|--------|--------|---------|--------|
| 166 |  | Ascl2(bHLH)/ESC-Ascl2-ChIP-Seq(GSE97712)/Homer                   | 1e-17 | - | 3.926e+01 | 0.0000 | 2442.0 | 28.52% | 20611.2 | 24.50% |
| 167 |  | Sox7(HMG)/ESC-Sox7-ChIP-Seq(GSE133899)/Homer                     | 1e-16 | - | 3.911e+01 | 0.0000 | 893.0  | 10.43% | 6601.1  | 7.85%  |
| 168 |  | ZNF189(Zf)/HEK293-ZNF189.GFP-ChIP-Seq(GSE58341)/Homer            | 1e-16 | - | 3.826e+01 | 0.0000 | 2291.0 | 26.76% | 19247.3 | 22.88% |
| 169 |  | KLF5(Zf)/LoVo-KLF5-ChIP-Seq(GSE49402)/Homer                      | 1e-16 | - | 3.789e+01 | 0.0000 | 3188.0 | 37.24% | 27723.3 | 32.95% |
| 170 |  | TCFL2(HMG)/K562-TCF7L2-ChIP-Seq(GSE29196)/Homer                  | 1e-16 | - | 3.776e+01 | 0.0000 | 320.0  | 3.74%  | 1910.5  | 2.27%  |
| 171 |  | Sp5(Zf)/mES-Sp5.Flag-ChIP-Seq(GSE72989)/Homer                    | 1e-16 | - | 3.731e+01 | 0.0000 | 2587.0 | 30.22% | 22059.2 | 26.22% |
| 172 |  | NFAT:AP1(RHD,bZIP)/Jurkat-NFATC1-ChIP-Seq(Jolma_et_al.)/Homer    | 1e-16 | - | 3.730e+01 | 0.0000 | 661.0  | 7.72%  | 4673.9  | 5.56%  |
| 173 |  | Hoxa10(Homeobox)/ChickenMSG-Hoxa10.Flag-ChIP-Seq(GSE86088)/Homer | 1e-15 | - | 3.572e+01 | 0.0000 | 1489.0 | 17.39% | 11986.0 | 14.25% |
| 174 |  | Tlx?(NR)/NPC-H3K4me1-ChIP-Seq(GSE16256)/Homer                    | 1e-15 | - | 3.567e+01 | 0.0000 | 1562.0 | 18.25% | 12649.4 | 15.03% |
| 175 |  | Maz(Zf)/HepG2-Maz-ChIP-Seq(GSE31477)/Homer                       | 1e-15 | - | 3.535e+01 | 0.0000 | 2903.0 | 33.91% | 25139.2 | 29.88% |
| 176 |  | Hoxd10(Homeobox)/ChickenMSG-Hoxd10.Flag-ChIP-Seq(GSE86088)/Homer | 1e-15 | - | 3.483e+01 | 0.0000 | 2717.0 | 31.74% | 23404.6 | 27.82% |
| 177 |  | Hand2(bHLH)/Mesoderm-Hand2-ChIP-Seq(GSE61475)/Homer              | 1e-14 | - | 3.425e+01 | 0.0000 | 1428.0 | 16.68% | 11490.6 | 13.66% |
| 178 |  | Bcl11a(Zf)/HSPC-BCL11A-ChIP-Seq(GSE104676)/Homer                 | 1e-14 | - | 3.419e+01 | 0.0000 | 2258.0 | 26.38% | 19124.6 | 22.73% |
| 179 |  | Elk4(ETS)/Hela-Elk4-ChIP-Seq(GSE31477)/Homer                     | 1e-14 | - | 3.414e+01 | 0.0000 | 1645.0 | 19.22% | 13465.2 | 16.00% |
| 180 |  | IRF:BATF(IRF:bZIP)/pDC-Irf8-ChIP-Seq(GSE66899)/Homer             | 1e-14 | - | 3.380e+01 | 0.0000 | 433.0  | 5.06%  | 2867.1  | 3.41%  |
| 181 |  | Max(bHLH)/K562-Max-ChIP-Seq(GSE31477)/Homer                      | 1e-14 | - | 3.336e+01 | 0.0000 | 1775.0 | 20.73% | 14688.4 | 17.46% |
| 182 |  | Barx1(Homeobox)/Stomach-Barx1.3xFlag-ChIP-Seq(GSE69483)/Homer    | 1e-14 | - | 3.310e+01 | 0.0000 | 1216.0 | 14.20% | 9627.5  | 11.44% |
| 183 |  | MNT(bHLH)/HepG2-MNT-ChIP-Seq(Encode)/Homer                       | 1e-14 | - | 3.306e+01 | 0.0000 | 2447.0 | 28.58% | 20948.8 | 24.90% |

|     |  |                                                                  |       |   |           |        |        |        |         |        |
|-----|--|------------------------------------------------------------------|-------|---|-----------|--------|--------|--------|---------|--------|
| 184 |  | ZNF467(Zf)/HEK293-ZNF467.GFP-ChIP-Seq(GSE58341)/Homer            | 1e-13 | - | 3.216e+01 | 0.0000 | 2221.0 | 25.94% | 18875.6 | 22.43% |
| 185 |  | NFkB-p65-Rel(RHD)/ThioMac-LPS-Expression(GSE23622)/Homer         | 1e-13 | - | 3.208e+01 | 0.0000 | 278.0  | 3.25%  | 1673.6  | 1.99%  |
| 186 |  | Hoxd13(Homeobox)/ChickenMSG-Hoxd13.Flag-ChIP-Seq(GSE86088)/Homer | 1e-13 | - | 3.198e+01 | 0.0000 | 3484.0 | 40.70% | 30874.3 | 36.69% |
| 187 |  | SpiB(ETS)/OCILY3-SPIB-ChIP-Seq(GSE56857)/Homer                   | 1e-13 | - | 3.133e+01 | 0.0000 | 756.0  | 8.83%  | 5636.3  | 6.70%  |
| 188 |  | TRPS1(Zf)/MCF7-TRPS1-ChIP-Seq(GSE107013)/Homer                   | 1e-13 | - | 3.108e+01 | 0.0000 | 3704.0 | 43.27% | 33049.0 | 39.28% |
| 189 |  | ZFX(Zf)/mES-Zfx-ChIP-Seq(GSE11431)/Homer                         | 1e-13 | - | 3.102e+01 | 0.0000 | 2903.0 | 33.91% | 25365.1 | 30.15% |
| 190 |  | Elk1(ETS)/Hela-Elk1-ChIP-Seq(GSE31477)/Homer                     | 1e-13 | - | 3.072e+01 | 0.0000 | 1645.0 | 19.22% | 13608.6 | 16.17% |
| 191 |  | TATA-Box(TBP)/Promoter/Homer                                     | 1e-13 | - | 3.058e+01 | 0.0000 | 3015.0 | 35.22% | 26456.7 | 31.44% |
| 192 |  | Hnf6b(Homeobox)/LNCaP-Hnf6b-ChIP-Seq(GSE106305)/Homer            | 1e-13 | - | 3.007e+01 | 0.0000 | 1672.0 | 19.53% | 13884.5 | 16.50% |
| 193 |  | COUP-TFII(NR)/Artia-Nr2f2-ChIP-Seq(GSE46497)/Homer               | 1e-12 | - | 2.977e+01 | 0.0000 | 3825.0 | 44.68% | 34300.0 | 40.77% |
| 194 |  | WT1(Zf)/Kidney-WT1-ChIP-Seq(GSE90016)/Homer                      | 1e-12 | - | 2.928e+01 | 0.0000 | 1617.0 | 18.89% | 13414.0 | 15.94% |
| 195 |  | Zic(Zf)/Cerebellum-ZIC1.2-ChIP-Seq(GSE60731)/Homer               | 1e-12 | - | 2.799e+01 | 0.0000 | 2173.0 | 25.38% | 18633.3 | 22.15% |
| 196 |  | Six1(Homeobox)/Myoblast-Six1-ChIP-Chip(GSE20150)/Homer           | 1e-12 | - | 2.779e+01 | 0.0000 | 868.0  | 10.14% | 6721.3  | 7.99%  |
| 197 |  | ZNF341(Zf)/EBV-ZNF341-ChIP-Seq(GSE113194)/Homer                  | 1e-11 | - | 2.754e+01 | 0.0000 | 1979.0 | 23.12% | 16844.0 | 20.02% |
| 198 |  | Tbx21(T-box)/GM12878-TBX21-ChIP-Seq(Encode)/Homer                | 1e-11 | - | 2.690e+01 | 0.0000 | 2116.0 | 24.72% | 18156.2 | 21.58% |
| 199 |  | PRDM10(Zf)/HEK293-PRDM10.eGFP-ChIP-Seq(Encode)/Homer             | 1e-11 | - | 2.679e+01 | 0.0000 | 1679.0 | 19.61% | 14098.9 | 16.76% |
| 200 |  | HIF-1b(HLH)/T47D-HIF1b-ChIP-Seq(GSE59937)/Homer                  | 1e-11 | - | 2.677e+01 | 0.0000 | 2188.0 | 25.56% | 18837.6 | 22.39% |
| 201 |  | CEBP:CEBP(bZIP)/MEF-Chop-ChIP-Seq(GSE35681)/Homer                | 1e-11 | - | 2.666e+01 | 0.0000 | 432.0  | 5.05%  | 3008.9  | 3.58%  |
| 202 |  | ELF1(ETS)/Jurkat-ELF1-ChIP-Seq(SRA014231)/Homer                  | 1e-11 | - | 2.619e+01 | 0.0000 | 1525.0 | 17.81% | 12708.0 | 15.10% |

|     |  |                                                           |       |            |        |        |        |         |        |
|-----|--|-----------------------------------------------------------|-------|------------|--------|--------|--------|---------|--------|
| 203 |  | VDR(NR),DR3/GM10855-VDR+vitD-ChIP-Seq(GSE22484)/Homer     | 1e-11 | -2.616e+01 | 0.0000 | 559.0  | 6.53%  | 4089.8  | 4.86%  |
| 204 |  | Unknown-ESC-element(?)/mES-Nanog-ChIP-Seq(GSE11724)/Homer | 1e-11 | -2.591e+01 | 0.0000 | 1679.0 | 19.61% | 14140.4 | 16.81% |
| 205 |  | ETS:RUNX(ETS,Runt)/Jurkat-RUNX1-ChIP-Seq(GSE17954)/Homer  | 1e-11 | -2.584e+01 | 0.0000 | 381.0  | 4.45%  | 2605.6  | 3.10%  |
| 206 |  | Chop(bZIP)/MEF-Chop-ChIP-Seq(GSE35681)/Homer              | 1e-10 | -2.514e+01 | 0.0000 | 656.0  | 7.66%  | 4952.0  | 5.89%  |
| 207 |  | RBPJ:Ebox(?),bHLH)/Panc1-Rbpj1-ChIP-Seq(GSE47459)/Homer   | 1e-10 | -2.500e+01 | 0.0000 | 930.0  | 10.86% | 7367.2  | 8.76%  |
| 208 |  | DMRT1(DM)/Testis-DMRT1-ChIP-Seq(GSE64892)/Homer           | 1e-10 | -2.446e+01 | 0.0000 | 667.0  | 7.79%  | 5068.7  | 6.02%  |
| 209 |  | Atf7(bZIP)/3T3L1-Atf7-ChIP-Seq(GSE56872)/Homer            | 1e-10 | -2.428e+01 | 0.0000 | 1272.0 | 14.86% | 10479.9 | 12.46% |
| 210 |  | ERRg(NR)/Kidney-ESRRG-ChIP-Seq(GSE104905)/Homer           | 1e-10 | -2.386e+01 | 0.0000 | 2048.0 | 23.92% | 17681.2 | 21.01% |
| 211 |  | NPAS2(bHLH)/Liver-NPAS2-ChIP-Seq(GSE39860)/Homer          | 1e-10 | -2.382e+01 | 0.0000 | 2305.0 | 26.92% | 20101.3 | 23.89% |
| 212 |  | ZNF264(Zf)/HEK293-ZNF264.GFP-ChIP-Seq(GSE58341)/Homer     | 1e-10 | -2.350e+01 | 0.0000 | 1668.0 | 19.48% | 14157.4 | 16.83% |
| 213 |  | Foxa3(Forkhead)/Liver-Foxa3-ChIP-Seq(GSE77670)/Homer      | 1e-10 | -2.318e+01 | 0.0000 | 1041.0 | 12.16% | 8432.7  | 10.02% |
| 214 |  | Tbx5(T-box)/HL1-Tbx5.biotin-ChIP-Seq(GSE21529)/Homer      | 1e-9  | -2.299e+01 | 0.0000 | 5406.0 | 63.15% | 50305.5 | 59.79% |
| 215 |  | Egr1(Zf)/K562-Egr1-ChIP-Seq(GSE32465)/Homer               | 1e-9  | -2.273e+01 | 0.0000 | 1685.0 | 19.68% | 14354.7 | 17.06% |
| 216 |  | MafA(bZIP)/Islet-MafA-ChIP-Seq(GSE30298)/Homer            | 1e-9  | -2.270e+01 | 0.0000 | 2414.0 | 28.20% | 21198.4 | 25.19% |
| 217 |  | Pit1(Homeobox)/GCrat-Pit1-ChIP-Seq(GSE58009)/Homer        | 1e-9  | -2.262e+01 | 0.0000 | 1952.0 | 22.80% | 16850.3 | 20.03% |
| 218 |  | Tbet(T-box)/CD8-Tbet-ChIP-Seq(GSE33802)/Homer             | 1e-9  | -2.210e+01 | 0.0000 | 2269.0 | 26.50% | 19862.8 | 23.61% |
| 219 |  | PSE(SNAPc)/K562-mStart-Seq/Homer                          | 1e-9  | -2.166e+01 | 0.0000 | 1334.0 | 15.58% | 11166.1 | 13.27% |
| 220 |  | Tcfcp2l1(CP2)/mES-Tcfcp2l1-ChIP-Seq(GSE11431)/Homer       | 1e-9  | -2.140e+01 | 0.0000 | 529.0  | 6.18%  | 3965.3  | 4.71%  |

|     |  |                                                                |      |            |        |        |        |         |        |
|-----|--|----------------------------------------------------------------|------|------------|--------|--------|--------|---------|--------|
| 221 |  | CREB5(bZIP)/LNCaP-CREB5.V5-ChIP-Seq(GSE137775)/Homer           | 1e-9 | -2.140e+01 | 0.0000 | 1045.0 | 12.21% | 8542.4  | 10.15% |
| 222 |  | Stat3(Stat)/mES-Stat3-ChIP-Seq(GSE11431)/Homer                 | 1e-9 | -2.128e+01 | 0.0000 | 1530.0 | 17.87% | 12992.3 | 15.44% |
| 223 |  | Cux2(Homeobox)/Liver-Cux2-ChIP-Seq(GSE35985)/Homer             | 1e-9 | -2.079e+01 | 0.0000 | 792.0  | 9.25%  | 6294.9  | 7.48%  |
| 224 |  | AP-2gamma(AP2)/MCF7-TFAP2C-ChIP-Seq(GSE21234)/Homer            | 1e-8 | -2.030e+01 | 0.0000 | 2475.0 | 28.91% | 21927.1 | 26.06% |
| 225 |  | THRb(NR)/HepG2-THRb.Flag-ChIP-Seq(Encode)/Homer                | 1e-8 | -2.006e+01 | 0.0000 | 1596.0 | 18.64% | 13669.4 | 16.25% |
| 226 |  | ZNF7(Zf)/HepG2-ZNF7.Flag-ChIP-Seq(Encode)/Homer                | 1e-8 | -2.001e+01 | 0.0000 | 1416.0 | 16.54% | 12003.3 | 14.27% |
| 227 |  | CUX1(Homeobox)/K562-CUX1-ChIP-Seq(GSE92882)/Homer              | 1e-8 | -2.001e+01 | 0.0000 | 1127.0 | 13.16% | 9349.2  | 11.11% |
| 228 |  | HRE(HSF)/Striatum-HSF1-ChIP-Seq(GSE38000)/Homer                | 1e-8 | -1.995e+01 | 0.0000 | 705.0  | 8.24%  | 5552.4  | 6.60%  |
| 229 |  | ZNF652/HepG2-ZNF652.Flag-ChIP-Seq(Encode)/Homer                | 1e-8 | -1.986e+01 | 0.0000 | 623.0  | 7.28%  | 4832.5  | 5.74%  |
| 230 |  | HNF6(Homeobox)/Liver-Hnf6-ChIP-Seq(ERP000394)/Homer            | 1e-8 | -1.893e+01 | 0.0000 | 985.0  | 11.51% | 8106.9  | 9.64%  |
| 231 |  | Atf2(bZIP)/3T3L1-Atf2-ChIP-Seq(GSE56872)/Homer                 | 1e-8 | -1.868e+01 | 0.0000 | 939.0  | 10.97% | 7700.4  | 9.15%  |
| 232 |  | Arnt:Ahr(bHLH)/MCF7-Arnt-ChIP-Seq(Lo_et_al.)/Homer             | 1e-8 | -1.861e+01 | 0.0000 | 1433.0 | 16.74% | 12234.9 | 14.54% |
| 233 |  | ETS:E-box(ETS,bHLH)/HPC7-ScI-ChIP-Seq(GSE22178)/Homer          | 1e-7 | -1.778e+01 | 0.0000 | 299.0  | 3.49%  | 2108.1  | 2.51%  |
| 234 |  | KLF1(Zf)/HUDEP2-KLF1-CutnRun(GSE136251)/Homer                  | 1e-7 | -1.773e+01 | 0.0000 | 2399.0 | 28.02% | 21376.8 | 25.41% |
| 235 |  | DMRT6(DM)/Testis-DMRT6-ChIP-Seq(GSE60440)/Homer                | 1e-7 | -1.759e+01 | 0.0000 | 556.0  | 6.49%  | 4321.9  | 5.14%  |
| 236 |  | KLF10(Zf)/HEK293-KLF10.GFP-ChIP-Seq(GSE58341)/Homer            | 1e-7 | -1.730e+01 | 0.0000 | 1897.0 | 22.16% | 16650.2 | 19.79% |
| 237 |  | CLOCK(bHLH)/Liver-Clock-ChIP-Seq(GSE39860)/Homer               | 1e-7 | -1.704e+01 | 0.0000 | 1285.0 | 15.01% | 10949.1 | 13.01% |
| 238 |  | ZNF675(Zf)/HEK293-ZNF675.GFP-ChIP-Seq(GSE58341)/Homer          | 1e-7 | -1.695e+01 | 0.0000 | 403.0  | 4.71%  | 3011.1  | 3.58%  |
| 239 |  | HOXB13(Homeobox)/ProstateTumor-HOXB13-ChIP-Seq(GSE56288)/Homer | 1e-7 | -1.691e+01 | 0.0000 | 2443.0 | 28.54% | 21853.2 | 25.97% |

|     |  |                                                                   |      |           |        |        |        |         |        |
|-----|--|-------------------------------------------------------------------|------|-----------|--------|--------|--------|---------|--------|
| 240 |  | CDX4(Homeobox)/ZebrafishEmbryos-Cdx4.Myc-ChIP-Seq(GSE48254)/Homer | 1e-7 | 1.689e+01 | 0.0000 | 2121.0 | 24.78% | 18793.3 | 22.34% |
| 241 |  | Npas4(bHLH)/Neuron-Npas4-ChIP-Seq(GSE127793)/Homer                | 1e-7 | 1.658e+01 | 0.0000 | 1679.0 | 19.61% | 14646.9 | 17.41% |
| 242 |  | c-Myc(bHLH)/mES-cMyc-ChIP-Seq(GSE11431)/Homer                     | 1e-7 | 1.645e+01 | 0.0000 | 1270.0 | 14.83% | 10842.8 | 12.89% |
| 243 |  | Oct2(POU,Homeobox)/Bcell-Oct2-ChIP-Seq(GSE21512)/Homer            | 1e-7 | 1.634e+01 | 0.0000 | 587.0  | 6.86%  | 4639.1  | 5.51%  |
| 244 |  | n-Myc(bHLH)/mES-nMyc-ChIP-Seq(GSE11431)/Homer                     | 1e-7 | 1.626e+01 | 0.0000 | 1671.0 | 19.52% | 14591.0 | 17.34% |
| 245 |  | Srebp1a(bHLH)/HepG2-Srebp1a-ChIP-Seq(GSE31477)/Homer              | 1e-7 | 1.618e+01 | 0.0000 | 560.0  | 6.54%  | 4406.0  | 5.24%  |
| 246 |  | Nur77(NR)/K562-NR4A1-ChIP-Seq(GSE31363)/Homer                     | 1e-7 | 1.617e+01 | 0.0000 | 514.0  | 6.00%  | 4001.2  | 4.76%  |
| 247 |  | USF1(bHLH)/GM12878-Usf1-ChIP-Seq(GSE32465)/Homer                  | 1e-6 | 1.609e+01 | 0.0000 | 1131.0 | 13.21% | 9578.5  | 11.38% |
| 248 |  | Prop1(Homeobox)/GHFT1-PROP1.biotin-ChIP-Seq(GSE77302)/Homer       | 1e-6 | 1.587e+01 | 0.0000 | 1177.0 | 13.75% | 10014.3 | 11.90% |
| 249 |  | Pdx1(Homeobox)/Islet-Pdx1-ChIP-Seq(SRA008281)/Homer               | 1e-6 | 1.573e+01 | 0.0000 | 2056.0 | 24.02% | 18257.0 | 21.70% |
| 250 |  | Zfp281(Zf)/ES-Zfp281-ChIP-Seq(GSE81042)/Homer                     | 1e-6 | 1.541e+01 | 0.0000 | 762.0  | 8.90%  | 6243.1  | 7.42%  |
| 251 |  | p63(p53)/Keratinocyte-p63-ChIP-Seq(GSE17611)/Homer                | 1e-6 | 1.533e+01 | 0.0000 | 938.0  | 10.96% | 7846.3  | 9.33%  |
| 252 |  | OCT:OCT-short(POU,Homeobox)/NPC-OCT6-ChIP-Seq(GSE43916)/Homer     | 1e-6 | 1.512e+01 | 0.0000 | 1423.0 | 16.62% | 12341.8 | 14.67% |
| 253 |  | ZNF317(Zf)/HEK293-ZNF317.GFP-ChIP-Seq(GSE58341)/Homer             | 1e-6 | 1.506e+01 | 0.0000 | 276.0  | 3.22%  | 1982.4  | 2.36%  |
| 254 |  | PRDM14(Zf)/H1-PRDM14-ChIP-Seq(GSE22767)/Homer                     | 1e-6 | 1.499e+01 | 0.0000 | 814.0  | 9.51%  | 6733.5  | 8.00%  |
| 255 |  | RORa(NR)/Liver-Rora-ChIP-Seq(GSE101115)/Homer                     | 1e-6 | 1.495e+01 | 0.0000 | 415.0  | 4.85%  | 3176.1  | 3.77%  |
| 256 |  | c-Jun-CRE(bZIP)/K562-cJun-ChIP-Seq(GSE31477)/Homer                | 1e-6 | 1.463e+01 | 0.0000 | 847.0  | 9.89%  | 7051.0  | 8.38%  |
| 257 |  | ZNF415(Zf)/HEK293-ZNF415.GFP-ChIP-Seq(GSE58341)/Homer             | 1e-6 | 1.445e+01 | 0.0000 | 1337.0 | 15.62% | 11580.3 | 13.76% |

|     |  |                                                             |      |           |        |        |        |         |        |
|-----|--|-------------------------------------------------------------|------|-----------|--------|--------|--------|---------|--------|
| 258 |  | Gli2(Zf)/GM2-Gli2-ChIP-Chip(GSE112702)/Homer                | 1e-6 | 1.441e+01 | 0.0000 | 681.0  | 7.95%  | 5556.2  | 6.60%  |
| 259 |  | PAX5(Paired,Homeobox)/GM12878-PAX5-ChIP-Seq(GSE32465)/Homer | 1e-6 | 1.419e+01 | 0.0000 | 978.0  | 11.42% | 8271.2  | 9.83%  |
| 260 |  | Usf2(bHLH)/C2C12-Usf2-ChIP-Seq(GSE36030)/Homer              | 1e-6 | 1.416e+01 | 0.0000 | 864.0  | 10.09% | 7228.4  | 8.59%  |
| 261 |  | RORg(NR)/Liver-Rorc-ChIP-Seq(GSE101115)/Homer               | 1e-6 | 1.416e+01 | 0.0000 | 269.0  | 3.14%  | 1946.1  | 2.31%  |
| 262 |  | PRDM9(Zf)/Testis-DMC1-ChIP-Seq(GSE35498)/Homer              | 1e-6 | 1.410e+01 | 0.0000 | 1061.0 | 12.39% | 9040.3  | 10.74% |
| 263 |  | NF1(CTF)/LNCAP-NF1-ChIP-Seq(Unpublished)/Homer              | 1e-6 | 1.410e+01 | 0.0000 | 1424.0 | 16.63% | 12414.1 | 14.75% |
| 264 |  | Six4(Homeobox)/MCF7-SIX4-ChIP-Seq(Encode)/Homer             | 1e-6 | 1.407e+01 | 0.0000 | 241.0  | 2.82%  | 1713.9  | 2.04%  |
| 265 |  | GLIS3(Zf)/Thyroid-Glis3.GFP-ChIP-Seq(GSE103297)/Homer       | 1e-6 | 1.383e+01 | 0.0000 | 3121.0 | 36.46% | 28608.2 | 34.00% |
| 266 |  | HRE(HSF)/HepG2-HSF1-ChIP-Seq(GSE31477)/Homer                | 1e-5 | 1.379e+01 | 0.0000 | 494.0  | 5.77%  | 3911.0  | 4.65%  |
| 267 |  | GATA3(Zf)/iTreg-Gata3-ChIP-Seq(GSE20898)/Homer              | 1e-5 | 1.374e+01 | 0.0000 | 2772.0 | 32.38% | 25250.3 | 30.01% |
| 268 |  | RORgt(NR)/EL4-RORgt.Flag-ChIP-Seq(GSE56019)/Homer           | 1e-5 | 1.366e+01 | 0.0000 | 371.0  | 4.33%  | 2835.0  | 3.37%  |
| 269 |  | RORgt(NR)/EL4-RORgt.Flag-ChIP-Seq(GSE56019)/Homer           | 1e-5 | 1.366e+01 | 0.0000 | 371.0  | 4.33%  | 2835.0  | 3.37%  |
| 270 |  | STAT1(Stat)/HelaS3-STAT1-ChIP-Seq(GSE12782)/Homer           | 1e-5 | 1.338e+01 | 0.0000 | 958.0  | 11.19% | 8130.1  | 9.66%  |
| 271 |  | HNF4a(NR),DR1/HepG2-HNF4a-ChIP-Seq(GSE25021)/Homer          | 1e-5 | 1.330e+01 | 0.0000 | 1298.0 | 15.16% | 11287.2 | 13.42% |
| 272 |  | ARE(NR)/LNCAP-AR-ChIP-Seq(GSE27824)/Homer                   | 1e-5 | 1.280e+01 | 0.0000 | 797.0  | 9.31%  | 6684.6  | 7.94%  |
| 273 |  | HOXA1(Homeobox)/mES-Hoxa1-ChIP-Seq(SRP084292)/Homer         | 1e-5 | 1.275e+01 | 0.0000 | 578.0  | 6.75%  | 4701.6  | 5.59%  |
| 274 |  | bHLHE41(bHLH)/proB-Bhlhe41-ChIP-Seq(GSE93764)/Homer         | 1e-5 | 1.252e+01 | 0.0000 | 2090.0 | 24.41% | 18819.2 | 22.37% |
| 275 |  | AP-2alpha(AP2)/Hela-AP2alpha-ChIP-Seq(GSE31477)/Homer       | 1e-5 | 1.246e+01 | 0.0000 | 1904.0 | 22.24% | 17055.3 | 20.27% |
| 276 |  | Esrrb(NR)/mES-Esrrb-ChIP-Seq(GSE11431)/Homer                | 1e-5 | 1.245e+01 | 0.0000 | 1608.0 | 18.78% | 14254.8 | 16.94% |

|     |  |                                                                  |      |           |        |        |        |         |        |
|-----|--|------------------------------------------------------------------|------|-----------|--------|--------|--------|---------|--------|
| 277 |  | Oct4:Sox17(POU,Homeobox,HMG)/F9-Sox17-ChIP-Seq(GSE44553)/Homer   | 1e-5 | 1.227e+01 | 0.0000 | 337.0  | 3.94%  | 2584.3  | 3.07%  |
| 278 |  | LXRE(NR),DR4/RAW-LXRb.biotin-ChIP-Seq(GSE21512)/Homer            | 1e-5 | 1.224e+01 | 0.0000 | 165.0  | 1.93%  | 1126.4  | 1.34%  |
| 279 |  | ETS(ETS)/Promoter/Homer                                          | 1e-5 | 1.206e+01 | 0.0000 | 1019.0 | 11.90% | 8768.6  | 10.42% |
| 280 |  | Oct6(POU,Homeobox)/NPC-Pou3f1-ChIP-Seq(GSE35496)/Homer           | 1e-5 | 1.198e+01 | 0.0000 | 825.0  | 9.64%  | 6983.0  | 8.30%  |
| 281 |  | Oct11(POU,Homeobox)/NCIH1048-POU2F3-ChIP-seq(GSE115123)/Homer    | 1e-5 | 1.179e+01 | 0.0000 | 655.0  | 7.65%  | 5440.7  | 6.47%  |
| 282 |  | Brachyury(T-box)/Mesoendoderm-Brachyury-ChIP-exo(GSE54963)/Homer | 1e-5 | 1.175e+01 | 0.0000 | 726.0  | 8.48%  | 6089.5  | 7.24%  |
| 283 |  | SF1(NR)/H295R-Nr5a1-ChIP-Seq(GSE44220)/Homer                     | 1e-5 | 1.157e+01 | 0.0000 | 1276.0 | 14.90% | 11194.7 | 13.31% |
| 284 |  | Zic3(Zf)/mES-Zic3-ChIP-Seq(GSE37889)/Homer                       | 1e-4 | 1.150e+01 | 0.0000 | 1530.0 | 17.87% | 13587.2 | 16.15% |
| 285 |  | Pit1+1bp(Homeobox)/GCrat-Pit1-ChIP-Seq(GSE58009)/Homer           | 1e-4 | 1.147e+01 | 0.0000 | 670.0  | 7.83%  | 5592.3  | 6.65%  |
| 286 |  | Zic2(Zf)/ESC-Zic2-ChIP-Seq(SRP197560)/Homer                      | 1e-4 | 1.132e+01 | 0.0000 | 1204.0 | 14.06% | 10537.9 | 12.52% |
| 287 |  | Unknown(Homeobox)/Limb-p300-ChIP-Seq/Homer                       | 1e-4 | 1.107e+01 | 0.0000 | 1529.0 | 17.86% | 13610.3 | 16.18% |
| 288 |  | Pbx3(Homeobox)/GM12878-PBX3-ChIP-Seq(GSE32465)/Homer             | 1e-4 | 1.093e+01 | 0.0000 | 652.0  | 7.62%  | 5455.6  | 6.48%  |
| 289 |  | Oct4(POU,Homeobox)/mES-Oct4-ChIP-Seq(GSE11431)/Homer             | 1e-4 | 1.080e+01 | 0.0000 | 914.0  | 10.68% | 7871.2  | 9.36%  |
| 290 |  | Brn1(POU,Homeobox)/NPC-Brn1-ChIP-Seq(GSE35496)/Homer             | 1e-4 | 1.075e+01 | 0.0000 | 612.0  | 7.15%  | 5100.1  | 6.06%  |
| 291 |  | FXR(NR),IR1/Liver-FXR-ChIP-Seq(Chong_et_al.)/Homer               | 1e-4 | 1.075e+01 | 0.0000 | 969.0  | 11.32% | 8384.6  | 9.97%  |
| 292 |  | Srebp2(bHLH)/HepG2-Srebp2-ChIP-Seq(GSE31477)/Homer               | 1e-4 | 1.066e+01 | 0.0000 | 363.0  | 4.24%  | 2868.5  | 3.41%  |
| 293 |  | Phox2a(Homeobox)/Neuron-Phox2a-ChIP-Seq(GSE31456)/Homer          | 1e-4 | 1.043e+01 | 0.0000 | 715.0  | 8.35%  | 6057.8  | 7.20%  |
| 294 |  | ZNF136(Zf)/HEK293-ZNF136.GFP-ChIP-Seq(GSE58341)/Homer            | 1e-4 | 1.039e+01 | 0.0000 | 243.0  | 2.84%  | 1829.2  | 2.17%  |



|     |                                                                                     |                                                                      |      |   |           |        |        |        |         |        |
|-----|-------------------------------------------------------------------------------------|----------------------------------------------------------------------|------|---|-----------|--------|--------|--------|---------|--------|
| 295 |     | NFkB-p50,p52(RHD)/Monocyte-p50-ChIP-Chip(Schreiber_et_al.)/Homer     | 1e-4 | - | 1.028e+01 | 0.0001 | 287.0  | 3.35%  | 2214.9  | 2.63%  |
| 296 |    | NF1:FOXA1(CTF,Forkhead)/LNCAP-FOXA1-ChIP-Seq(GSE27824)/Homer         | 1e-4 | - | 1.027e+01 | 0.0001 | 375.0  | 4.38%  | 2989.2  | 3.55%  |
| 297 |    | EKLf(Zf)/Erythrocyte-Klf1-ChIP-Seq(GSE20478)/Homer                   | 1e-4 | - | 1.022e+01 | 0.0001 | 799.0  | 9.33%  | 6842.1  | 8.13%  |
| 298 |    | T1ISRE(IRF)/ThioMac-lfnb-Expression/Homer                            | 1e-4 | - | 1.006e+01 | 0.0001 | 57.0   | 0.67%  | 315.4   | 0.37%  |
| 299 |    | Phox2b(Homeobox)/CLBGA-PHOX2B-ChIP-Seq(GSE90683)/Homer               | 1e-4 | - | 1.005e+01 | 0.0001 | 378.0  | 4.42%  | 3024.7  | 3.59%  |
| 300 |    | GRE(NR),IR3/RAW264.7-GRE-ChIP-Seq(Unpublished)/Homer                 | 1e-4 | - | 1.004e+01 | 0.0001 | 671.0  | 7.84%  | 5675.3  | 6.75%  |
| 301 |    | PBX1(Homeobox)/MCF7-PBX1-ChIP-Seq(GSE28007)/Homer                    | 1e-4 | - | 9.938e+00 | 0.0001 | 248.0  | 2.90%  | 1886.2  | 2.24%  |
| 302 |    | Pknox1(Homeobox)/ES-Prep1-ChIP-Seq(GSE63282)/Homer                   | 1e-4 | - | 9.768e+00 | 0.0001 | 609.0  | 7.11%  | 5122.6  | 6.09%  |
| 303 |    | Nr5a2(NR)/Pancreas-LRH1-ChIP-Seq(GSE34295)/Homer                     | 1e-4 | - | 9.664e+00 | 0.0001 | 1806.0 | 21.10% | 16352.4 | 19.44% |
| 304 |    | MYNN(Zf)/HEK293-MYNN.eGFP-ChIP-Seq(Encode)/Homer                     | 1e-4 | - | 9.620e+00 | 0.0001 | 644.0  | 7.52%  | 5450.6  | 6.48%  |
| 305 |    | GRHL2(CP2)/HBE-GRHL2-ChIP-Seq(GSE46194)/Homer                        | 1e-4 | - | 9.377e+00 | 0.0001 | 895.0  | 10.45% | 7783.2  | 9.25%  |
| 306 |    | Pax8(Paired,Homeobox)/Thyroid-Pax8-ChIP-Seq(GSE26938)/Homer          | 1e-3 | - | 9.201e+00 | 0.0001 | 867.0  | 10.13% | 7534.9  | 8.96%  |
| 307 |   | Tbox:Smad(T-box,MAD)/ESCd5-Smad2_3-ChIP-Seq(GSE29422)/Homer          | 1e-3 | - | 8.922e+00 | 0.0002 | 514.0  | 6.00%  | 4299.3  | 5.11%  |
| 308 |  | GRE(NR),IR3/A549-GR-ChIP-Seq(GSE32465)/Homer                         | 1e-3 | - | 8.575e+00 | 0.0003 | 395.0  | 4.61%  | 3238.6  | 3.85%  |
| 309 |  | Mouse_Recombination_Hotspot(Zf)/Testis-DMC1-ChIP-Seq(GSE24438)/Homer | 1e-3 | - | 8.531e+00 | 0.0003 | 179.0  | 2.09%  | 1334.4  | 1.59%  |
| 310 |  | HOXA2(Homeobox)/mES-Hoxa2-ChIP-Seq(Donaldson_et_al.)/Homer           | 1e-3 | - | 8.469e+00 | 0.0003 | 241.0  | 2.82%  | 1873.1  | 2.23%  |
| 311 |  | EBF1(EBF)/Near-E2A-ChIP-Seq(GSE21512)/Homer                          | 1e-3 | - | 8.219e+00 | 0.0004 | 2709.0 | 31.64% | 25171.5 | 29.92% |
| 312 |  | LRF(Zf)/Erythroblasts-ZBTB7A-ChIP-Seq(GSE74977)/Homer                | 1e-3 | - | 7.845e+00 | 0.0006 | 2425.0 | 28.33% | 22469.2 | 26.71% |

|     |                                                                                     |                                                            |      |            |        |        |        |         |        |
|-----|-------------------------------------------------------------------------------------|------------------------------------------------------------|------|------------|--------|--------|--------|---------|--------|
| 313 |     | Duxbl(Homeobox)/NIH3T3-Duxbl.HA-ChIP-Seq(GSE119782)/Homer  | 1e-3 | -7.831e+00 | 0.0006 | 146.0  | 1.71%  | 1072.6  | 1.27%  |
| 314 |    | GLI3(Zf)/Limb-GLI3-ChIP-Chip(GSE11077)/Homer               | 1e-3 | -7.653e+00 | 0.0007 | 310.0  | 3.62%  | 2515.1  | 2.99%  |
| 315 |    | Reverb(NR),DR2/RAW-Reverba.biotin-ChIP-Seq(GSE45914)/Homer | 1e-3 | -7.476e+00 | 0.0008 | 392.0  | 4.58%  | 3262.3  | 3.88%  |
| 316 |    | HIF2a(bHLH)/785_O-HIF2a-ChIP-Seq(GSE34871)/Homer           | 1e-3 | -7.452e+00 | 0.0008 | 734.0  | 8.57%  | 6412.3  | 7.62%  |
| 317 |    | Twist(bHLH)/HMLE-TWIST1-ChIP-Seq(Chang_et_al)/Homer        | 1e-3 | -7.412e+00 | 0.0008 | 346.0  | 4.04%  | 2849.2  | 3.39%  |
| 318 |    | Hoxc9(Homeobox)/Ainv15-Hoxc9-ChIP-Seq(GSE21812)/Homer      | 1e-3 | -7.359e+00 | 0.0009 | 1214.0 | 14.18% | 10930.6 | 12.99% |
| 319 |    | MafF(bZIP)/HepG2-MafF-ChIP-Seq(GSE31477)/Homer             | 1e-3 | -7.308e+00 | 0.0009 | 689.0  | 8.05%  | 6003.5  | 7.14%  |
| 320 |    | ZNF322(Zf)/HEK293-ZNF322.GFP-ChIP-Seq(GSE58341)/Homer      | 1e-3 | -7.239e+00 | 0.0010 | 781.0  | 9.12%  | 6865.8  | 8.16%  |
| 321 |    | Tbx6(T-box)/ESC-Tbx6-ChIP-Seq(GSE93524)/Homer              | 1e-3 | -7.188e+00 | 0.0010 | 2044.0 | 23.88% | 18872.4 | 22.43% |
| 322 |    | NFY(CCAAT)/Promoter/Homer                                  | 1e-3 | -6.986e+00 | 0.0013 | 1840.0 | 21.49% | 16935.9 | 20.13% |
| 323 |    | ZKSCAN1(Zf)/HepG2-ZKSCAN1-ChIP-Seq(Encode)/Homer           | 1e-3 | -6.975e+00 | 0.0013 | 82.0   | 0.96%  | 558.1   | 0.66%  |
| 324 |    | ZBTB12(Zf)/HEK293-ZBTB12.GFP-ChIP-Seq(GSE58341)/Homer      | 1e-2 | -6.865e+00 | 0.0014 | 1076.0 | 12.57% | 9667.5  | 11.49% |
| 325 |   | Rfx5(HTH)/GM12878-Rfx5-ChIP-Seq(GSE31477)/Homer            | 1e-2 | -6.703e+00 | 0.0017 | 937.0  | 10.94% | 8369.7  | 9.95%  |
| 326 |  | FOXA1:AR(Forkhead,NR)/LNCAP-AR-ChIP-Seq(GSE27824)/Homer    | 1e-2 | -6.663e+00 | 0.0017 | 220.0  | 2.57%  | 1753.7  | 2.08%  |
| 327 |  | p53(p53)/Saos-p53-ChIP-Seq(GSE15780)/Homer                 | 1e-2 | -6.629e+00 | 0.0018 | 253.0  | 2.96%  | 2048.5  | 2.43%  |
| 328 |  | p53(p53)/Saos-p53-ChIP-Seq/Homer                           | 1e-2 | -6.629e+00 | 0.0018 | 253.0  | 2.96%  | 2048.5  | 2.43%  |
| 329 |  | STAT5(Stat)/mCD4+-Stat5-ChIP-Seq(GSE12346)/Homer           | 1e-2 | -6.600e+00 | 0.0018 | 1061.0 | 12.39% | 9548.5  | 11.35% |
| 330 |  | ZNF143 STAF(Zf)/CUTLL-ZNF143-ChIP-Seq(GSE29600)/Homer      | 1e-2 | -6.082e+00 | 0.0030 | 1044.0 | 12.19% | 9433.0  | 11.21% |

|     |  |                                                               |      |            |        |        |        |         |        |
|-----|--|---------------------------------------------------------------|------|------------|--------|--------|--------|---------|--------|
| 331 |  | PAX6(Paired,Homeobox)/Forebrain-Pax6-ChIP-Seq(GSE66961)/Homer | 1e-2 | -6.050e+00 | 0.0031 | 221.0  | 2.58%  | 1786.7  | 2.12%  |
| 332 |  | Nr5a2(NR)/mES-Nr5a2-ChIP-Seq(GSE19019)/Homer                  | 1e-2 | -5.946e+00 | 0.0035 | 1377.0 | 16.08% | 12614.5 | 14.99% |
| 333 |  | bHLHE40(bHLH)/HepG2-BHLHE40-ChIP-Seq(GSE31477)/Homer          | 1e-2 | -5.673e+00 | 0.0045 | 633.0  | 7.39%  | 5595.8  | 6.65%  |
| 334 |  | Pax7(Paired,Homeobox)/Myoblast-Pax7-ChIP-Seq(GSE25064)/Homer  | 1e-2 | -5.588e+00 | 0.0049 | 157.0  | 1.83%  | 1236.5  | 1.47%  |
| 335 |  | Zfp809(Zf)/ES-Zfp809-ChIP-Seq(GSE70799)/Homer                 | 1e-2 | -5.557e+00 | 0.0051 | 520.0  | 6.07%  | 4549.4  | 5.41%  |
| 336 |  | Brn2(POU,Homeobox)/NPC-Brn2-ChIP-Seq(GSE35496)/Homer          | 1e-2 | -5.468e+00 | 0.0055 | 189.0  | 2.21%  | 1524.6  | 1.81%  |
| 337 |  | PBX2(Homeobox)/K562-PBX2-ChIP-Seq(Encode)/Homer               | 1e-2 | -5.258e+00 | 0.0068 | 1794.0 | 20.96% | 16692.6 | 19.84% |
| 338 |  | GATA(Zf),IR3/iTreg-Gata3-ChIP-Seq(GSE20898)/Homer             | 1e-2 | -5.247e+00 | 0.0069 | 159.0  | 1.86%  | 1266.6  | 1.51%  |
| 339 |  | HIF-1a(bHLH)/MCF7-HIF1a-ChIP-Seq(GSE28352)/Homer              | 1e-2 | -5.198e+00 | 0.0072 | 492.0  | 5.75%  | 4313.1  | 5.13%  |
| 340 |  | ZNF669(Zf)/HEK293-ZNF669.GFP-ChIP-Seq(GSE58341)/Homer         | 1e-2 | -5.139e+00 | 0.0076 | 179.0  | 2.09%  | 1448.8  | 1.72%  |
| 341 |  | HNF1b(Homeobox)/PDAC-HNF1B-ChIP-Seq(GSE64557)/Homer           | 1e-2 | -5.138e+00 | 0.0076 | 256.0  | 2.99%  | 2142.8  | 2.55%  |
| 342 |  | GATA(Zf),IR3/iTreg-Gata3-ChIP-Seq(GSE20898)/Homer             | 1e-2 | -5.114e+00 | 0.0077 | 304.0  | 3.55%  | 2581.8  | 3.07%  |
| 343 |  | ZSCAN22(Zf)/HEK293-ZSCAN22.GFP-ChIP-Seq(GSE58341)/Homer       | 1e-2 | -5.026e+00 | 0.0084 | 215.0  | 2.51%  | 1776.5  | 2.11%  |
| 344 |  | Rfx1(HTH)/NPC-H3K4me1-ChIP-Seq(GSE16256)/Homer                | 1e-2 | -4.721e+00 | 0.0114 | 556.0  | 6.49%  | 4946.1  | 5.88%  |
| 345 |  | Hoxb4(Homeobox)/ES-Hoxb4-ChIP-Seq(GSE34014)/Homer             | 1e-2 | -4.671e+00 | 0.0119 | 470.0  | 5.49%  | 4146.0  | 4.93%  |
